# Supplementary material for: New Isocoumarins from the Marine Fungus Phaeosphaeriopsis sp. WP-26
Source: MDPI journal article supplement (doi:10.3390/md21030150), 2023-02-25
Supplement: s1 [file s1]

## Supplementary Information

# New Isocoumarins from the Marine Fungus *Phaeosphaeriopsis* sp. WP-26

Pei Wang <sup>1,2</sup>, Huifang Wang <sup>1</sup>, Juchun Yang <sup>1</sup>, Li Yang <sup>1</sup>, Caihong Cai <sup>1</sup>, Jingzhe Yuan <sup>1</sup>, Fei Wu <sup>1</sup>,  
Cuijuan Gai <sup>1</sup>, Wenli Mei <sup>1,\*</sup> and Haofu Dai <sup>1,\*</sup>

<sup>1</sup> Key Laboratory of Research and Development of Natural Product from Li Folk Medicine of Hainan Province, Hainan Institute for Tropical Agricultural Resources, Institute of Tropical Bioscience and Biotechnology, Chinese Academy of Tropical Agricultural Sciences, Haikou 571101, China

<sup>2</sup> School of Chemistry and Chemical Engineering, Guangxi Minzu University, Nanning 530000, China

\* Correspondence: meiwenli@itbb.org.cn (W.M.); daihaofu@itbb.org.cn (H.D.); Tel./Fax: +86-0898-6698-7529 (W.M.); +86-0898-6696-1869 (H.D.)

## Table of Contents

|                                                                                                                                            |     |
|--------------------------------------------------------------------------------------------------------------------------------------------|-----|
| S1. The ITS gene sequences data of <i>Phaeosphaeriopsis</i> sp. WP-26.....                                                                 | S4  |
| Figure S1. <sup>1</sup> H NMR spectrum (500 MHz) for compound <b>1</b> in CH <sub>3</sub> OH- <i>d</i> <sub>4</sub> .....                  | S5  |
| Figure S2. <sup>13</sup> C NMR and DEPT135 spectra (125 MHz) of compound <b>1</b> in CH <sub>3</sub> OH- <i>d</i> <sub>4</sub> .....       | S5  |
| Figure S3. HSQC spectrum (500 MHz) of compound <b>1</b> in CH <sub>3</sub> OH- <i>d</i> <sub>4</sub> .....                                 | S6  |
| Figure S4. <sup>1</sup> H- <sup>1</sup> H COSY spectrum (500 MHz) of compound <b>1</b> in CH <sub>3</sub> OH- <i>d</i> <sub>4</sub> .....  | S6  |
| Figure S5. HMBC spectrum (500 MHz) of compound <b>1</b> in CH <sub>3</sub> OH- <i>d</i> <sub>4</sub> . ....                                | S7  |
| Figure S6. HRESIMS spectrum for compound <b>1</b> .....                                                                                    | S8  |
| Figure S7. <sup>1</sup> H NMR spectrum (500 MHz) data for compound <b>2</b> in CH <sub>3</sub> OH- <i>d</i> <sub>4</sub> .....             | S9  |
| Figure S8. <sup>13</sup> C NMR and DEPT135 spectra (125 MHz) of compound <b>2</b> in DMSO- <i>d</i> <sub>6</sub> .....                     | S9  |
| Figure S9. HSQC spectrum (500 MHz) of compound <b>2</b> in CH <sub>3</sub> OH- <i>d</i> <sub>4</sub> .....                                 | S10 |
| Figure S10. <sup>1</sup> H- <sup>1</sup> H COSY spectrum (500 MHz) of compound <b>2</b> in CH <sub>3</sub> OH- <i>d</i> <sub>4</sub> ..... | S10 |
| Figure S11. HMBC spectrum (500 MHz) of compound <b>2</b> in CH <sub>3</sub> OH- <i>d</i> <sub>4</sub> ....                                 | S11 |
| Figure S12. HRESIMS spectrum for compound <b>2</b> .....                                                                                   | S12 |
| FigureS13. <sup>1</sup> H NMR spectrum (500 MHz) data for compound <b>3</b> in CH <sub>3</sub> OH- <i>d</i> <sub>4</sub> .....             | S13 |
| Figure S14. <sup>13</sup> C NMR and DEPT135 spectra (125 MHz) of compound <b>3</b> in DMSO- <i>d</i> <sub>6</sub> .....                    | S13 |
| Figure S15. HSQC spectrum (500 MHz) of compound <b>3</b> in CH <sub>3</sub> OH- <i>d</i> <sub>4</sub> .....                                | S14 |
| Figure S16. <sup>1</sup> H- <sup>1</sup> H COSY spectrum (500 MHz) of compound <b>3</b> in CH <sub>3</sub> OH- <i>d</i> <sub>4</sub> ..... | S14 |
| Figure S17. HMBC spectrum (500 MHz) of compound <b>3</b> in CH <sub>3</sub> OH- <i>d</i> <sub>4</sub> ....                                 | S15 |
| Figure S18. ROESY spectrum (500 MHz) of compound <b>3</b> in CH <sub>3</sub> OH- <i>d</i> <sub>4</sub> . ....                              | S15 |
| Figure S19. 1D NOESY spectrum (500 MHz) of compound <b>3</b> in CH <sub>3</sub> OH- <i>d</i> <sub>4</sub> . ....                           | S16 |
| Figure S20. HRESIMS spectrum for compound <b>3</b> .....                                                                                   | S17 |
| Figure S21. <sup>1</sup> H NMR spectrum (600 MHz) data for compound <b>4</b> in CH <sub>3</sub> OH- <i>d</i> <sub>4</sub> .....            | S18 |
| Figure S22. <sup>13</sup> C NMR and DEPT 135 spectra (150 MHz) of compound <b>4</b> in CH <sub>3</sub> OH- <i>d</i> <sub>4</sub> .....     | S18 |
| Figure S23. HSQC spectrum (600 MHz) of compound <b>4</b> in CH <sub>3</sub> OH- <i>d</i> <sub>4</sub> .....                                | S19 |
| Figure S24. <sup>1</sup> H- <sup>1</sup> H COSY spectrum (600 MHz) of compound <b>4</b> in CH <sub>3</sub> OH- <i>d</i> <sub>4</sub> ..... | S19 |
| Figure S25. HMBC spectrum (600 MHz) of compound <b>4</b> in CH <sub>3</sub> OH- <i>d</i> <sub>4</sub> .....                                | S20 |
| Figure S26. HRESIMS spectrum for compound <b>4</b> .....                                                                                   | S21 |
| Figure S27. <sup>1</sup> H NMR spectrum (600 MHz) data for compound <b>5</b> in CH <sub>3</sub> OH- <i>d</i> <sub>4</sub> .....            | S22 |
| Figure S28. <sup>13</sup> C NMR and DEPT135 spectra (150 MHz) of compound <b>5</b> in DMSO- <i>d</i> <sub>6</sub> .....                    | S22 |
| Figure S29. HSQC spectrum (600 MHz) of compound <b>5</b> in CH <sub>3</sub> OH- <i>d</i> <sub>4</sub> .....                                | S23 |

|                                                                                                                                                                       |     |
|-----------------------------------------------------------------------------------------------------------------------------------------------------------------------|-----|
| <b>Figure S30.</b> $^1\text{H}$ - $^1\text{H}$ COSY spectrum (600 MHz) of compound <b>5</b> in $\text{CH}_3\text{OH}-d_4$ .....                                       | S23 |
| <b>Figure S31.</b> HMBC spectrum (600 MHz) of compound <b>5</b> in $\text{CH}_3\text{OH}-d_4$ .....                                                                   | S24 |
| <b>Figure S32.</b> ROESY spectrum (600 MHz) of compound <b>5</b> in $\text{CH}_3\text{OH}-d_4$ . ....                                                                 | S24 |
| <b>Figure S33.</b> 1D NOESY spectrum (500 MHz) of compound <b>5</b> in $\text{CH}_3\text{OH}-d_4$ . ....                                                              | S25 |
| <b>Figure S34.</b> HRESIMS spectrum for compound <b>5</b> .....                                                                                                       | S26 |
| <b>Table S1.</b> $^1\text{H}$ and $^{13}\text{C}$ NMR Data for compound <b>6</b> and 6,8-dihydroxy-7- methoxy-3-methylisocoumarin in $\text{CH}_3\text{OH}-d_4$ ..... | S27 |
| <b>Table S2.</b> $^1\text{H}$ and $^{13}\text{C}$ NMR Data for compound <b>7</b> and Diaporthein A in $\text{CHCl}_3$ .....                                           | S27 |
| <b>Table S3.</b> $^1\text{H}$ and $^{13}\text{C}$ NMR Data for compound <b>8</b> and Diaporthein B in $\text{CHCl}_3-d$ .....                                         | S28 |

**S1. The ITS gene sequences data of *Phaeosphaeriopsis* sp. WP-26**

CCTGCGGAAGGATCATTACATTCAGTAGCCCAGCTACTTGTTTACACCCTTGTCTTTTTGCGTACTTATC  
GTTTCCTCGGCGGGCTTGCCTGCCGGTTGGACAACCTTTATAACCTTTTTAAATCTTCAATCAGCGTCTG  
AATAATATACAATAATTACAACCTTTCAACAACGGATCTCTTGGTTCTGGCATCGATGAAGAACGCAGCG  
AAATGCGATAAGTAGTGTGAATTGCAGAATTCAGTGAATCATCGAATCTTTGAACGCACATTGCGCCC  
CTTGGTATTCCATGGGGCATGCCTGTTTCGAGCGTCATTTGTACCTTCAAGCTTTGCTTGGTGTGGGTG  
CTTGTCTTTTTGTTAAGACTCACCTCAAAGTCATTGGCAGCCAGTGTTTTGGTAGTAAGCGCAGCACAT  
TTTGCGTCTTGGTCCCTTAACAGCAGCATCCATCAAGCCATTTTCTCACTTTTGACCTCGGATCAGGTA  
GGGATACCCGCTGAACTTAAGCATATCAAT

**Figure S1.**  $^1\text{H}$  NMR spectrum (500 MHz) data for compound **1** in  $\text{CH}_3\text{OH}-d_4$

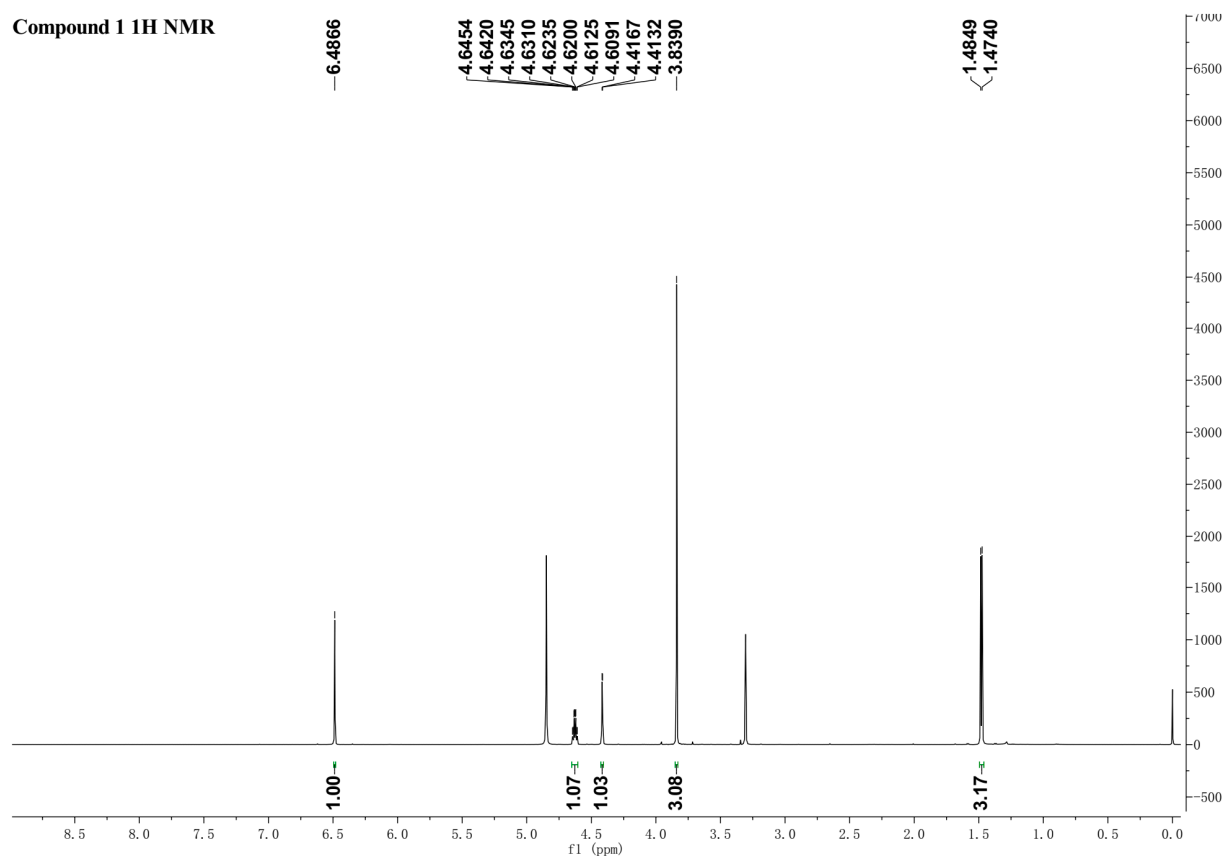

**Figure S2.**  $^{13}\text{C}$  NMR and DEPT135 spectra (125 MHz) of compound **1** in  $\text{CH}_3\text{OH}-d_4$

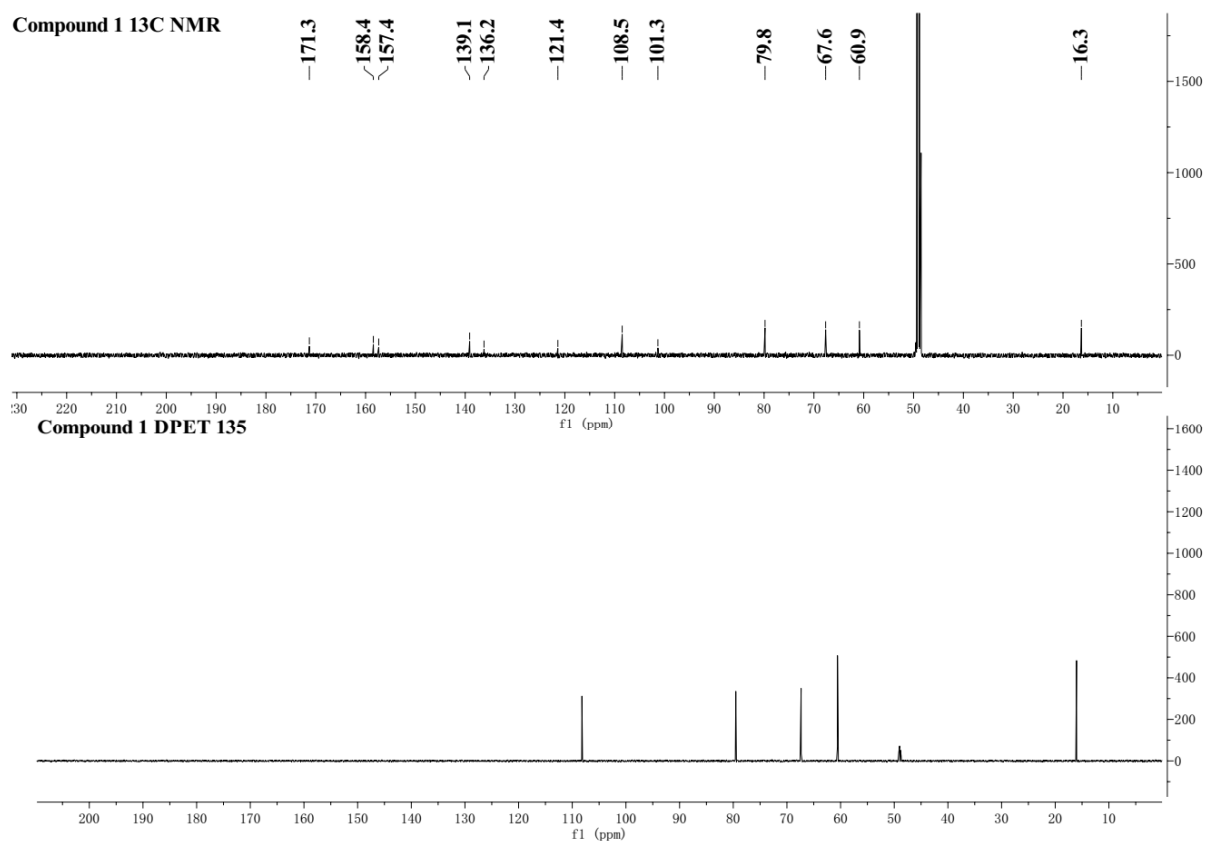

**Figure S3.** HSQC spectrum (500 MHz) of compound **1** in CH<sub>3</sub>OH-*d*<sub>4</sub>

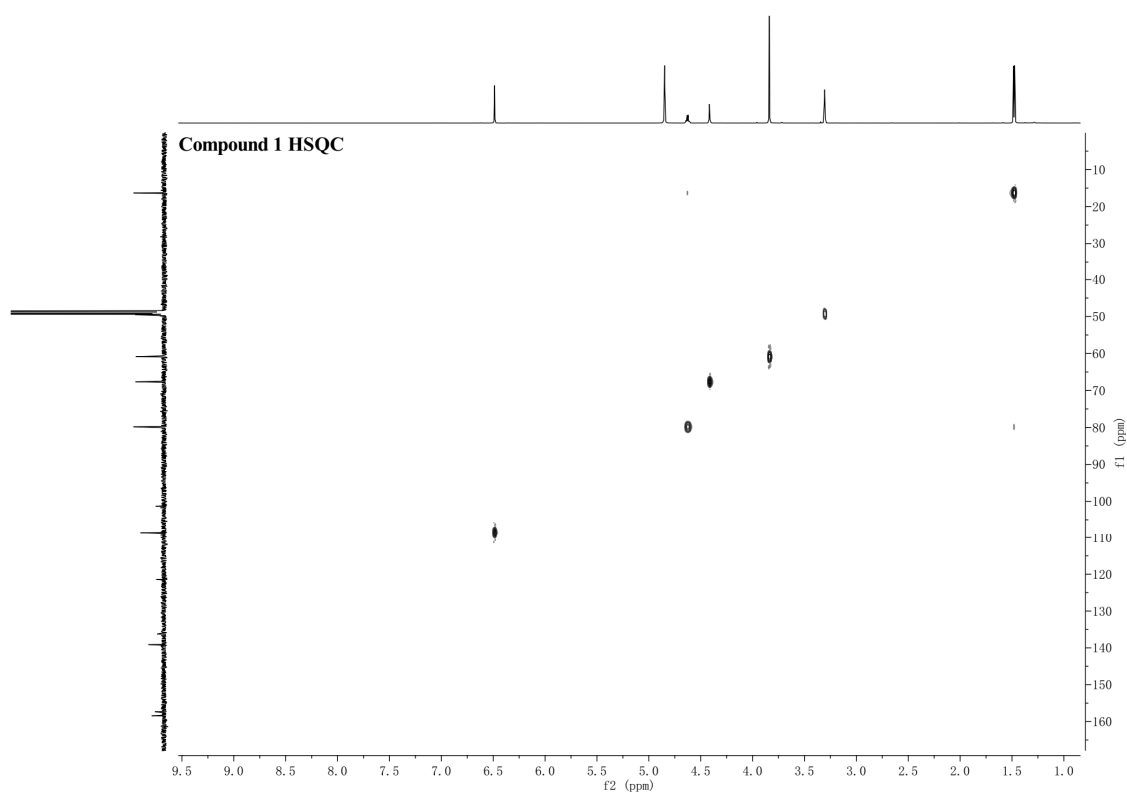

**Figure S4.** <sup>1</sup>H-<sup>1</sup>H COSY spectrum (500 MHz) of compound **1** in CH<sub>3</sub>OH-*d*<sub>4</sub>

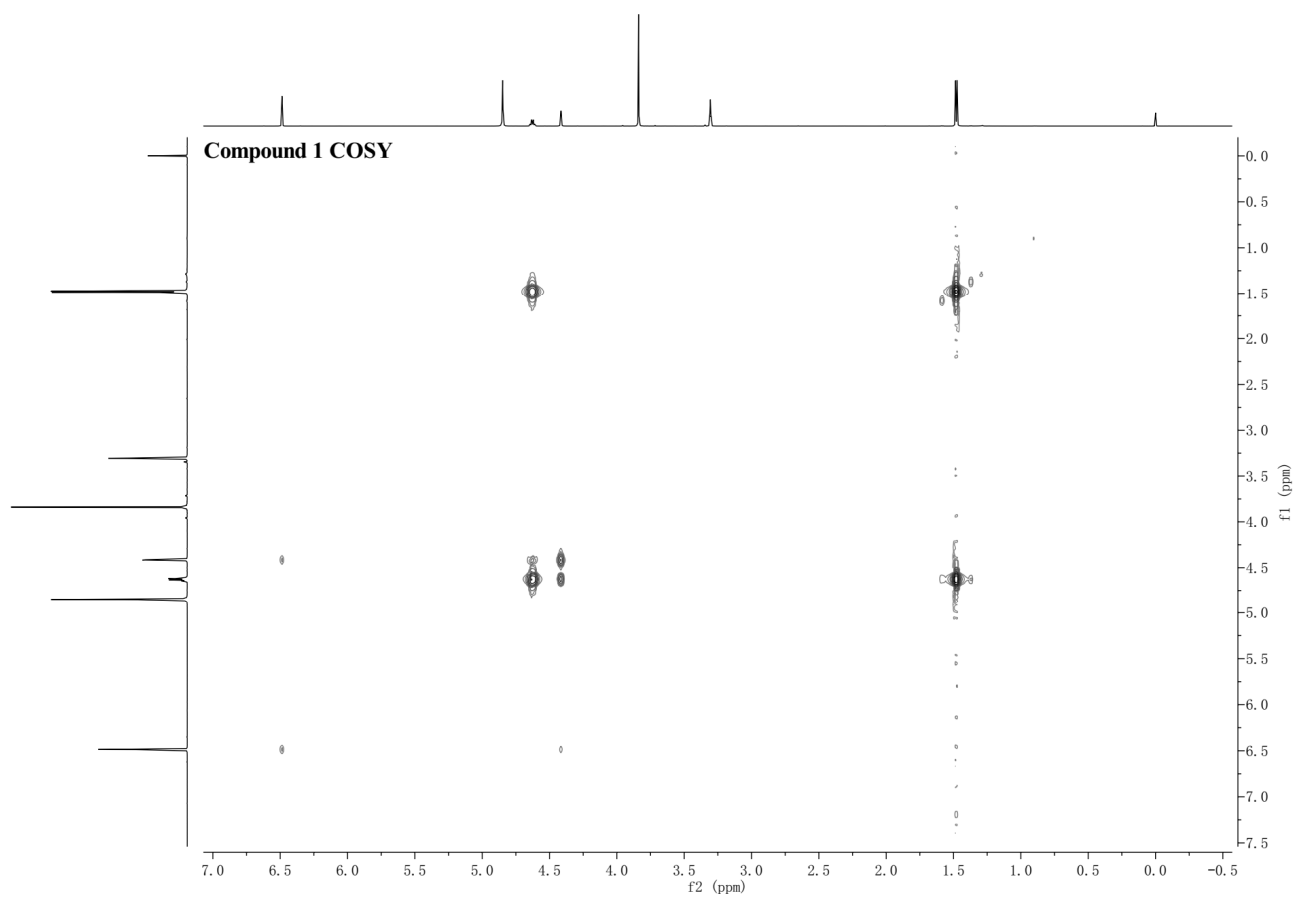

**Figure S5.** HMBC spectrum (500 MHz) of compound **1** in  $\text{CH}_3\text{OH}-d_4$

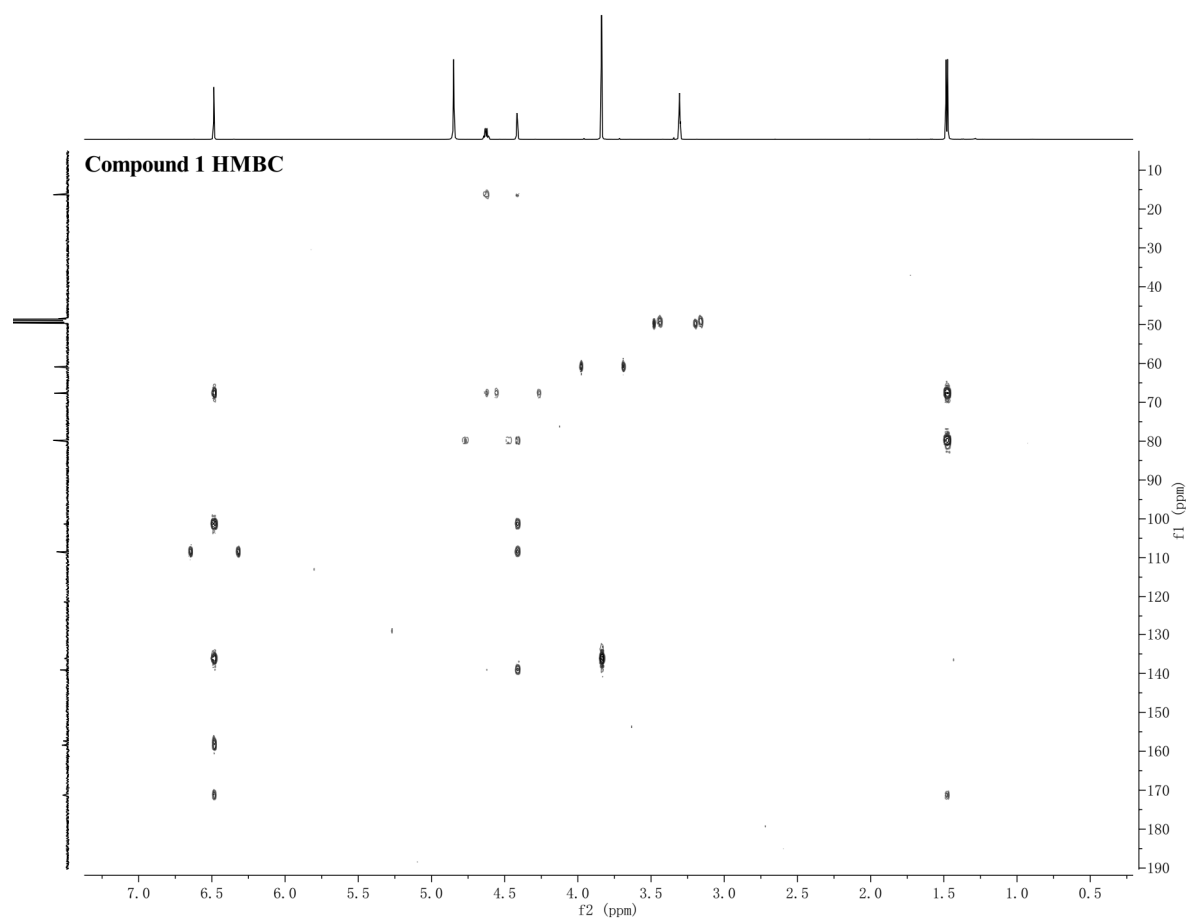

**Figure S6. HRESIMS spectrum for compound 1**

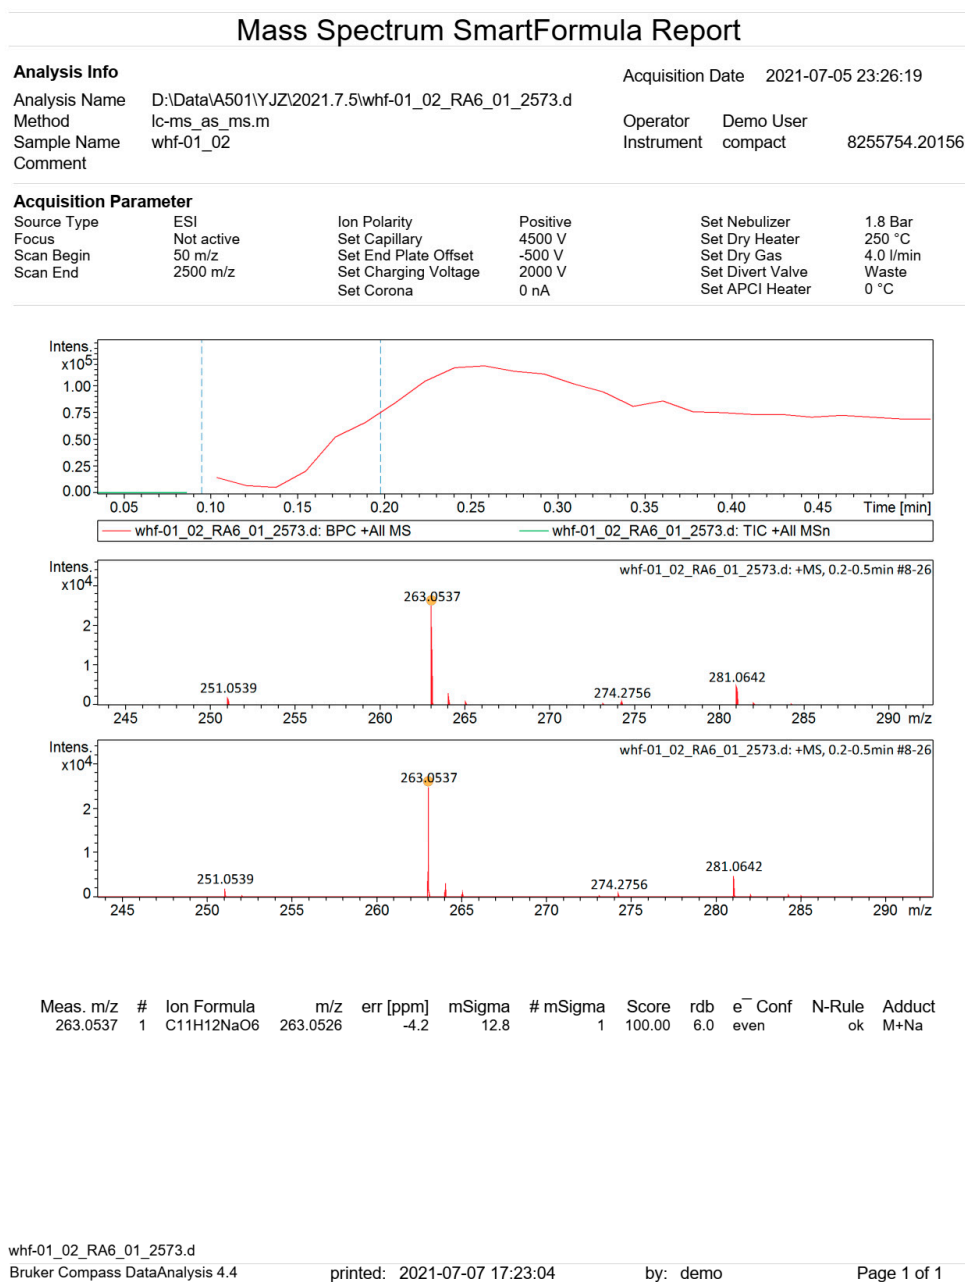



**Figure S7.**  $^1\text{H}$  NMR spectrum (500 MHz) data for compound **2** in  $\text{CH}_3\text{OH}-d_4$

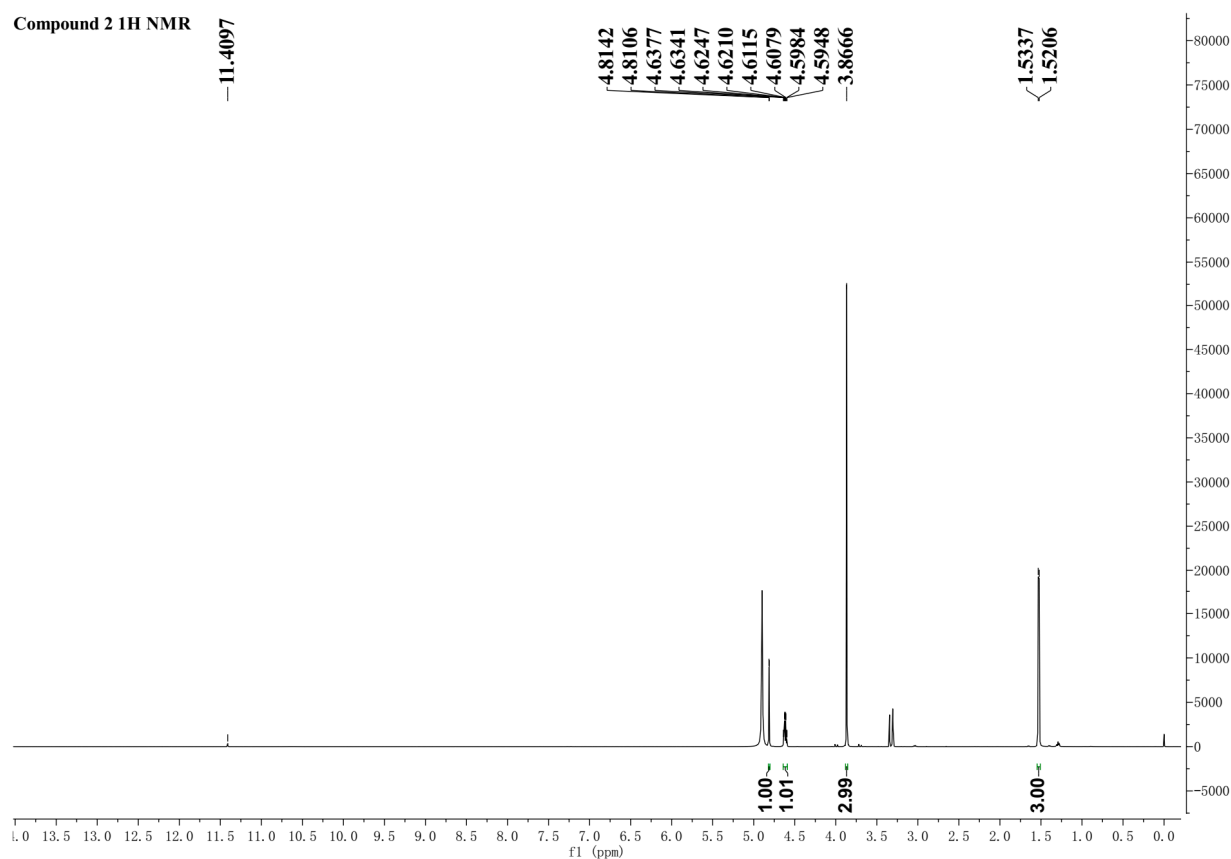

**Figure S8.**  $^{13}\text{C}$  NMR and DEPT135 spectra (125 MHz) data for compound **2** in  $\text{CH}_3\text{OH}-d_4$

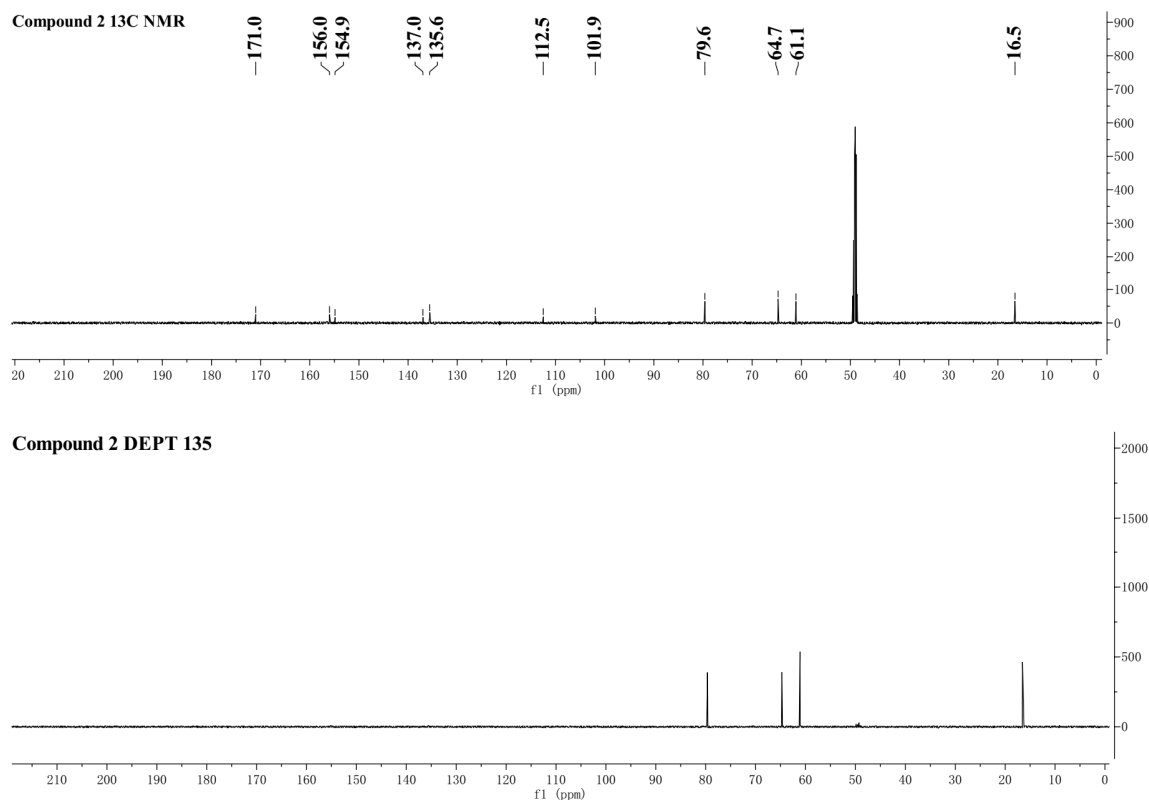

**Figure S9.** HSQC spectrum (500 MHz) of compound **2** in CH<sub>3</sub>OH-*d*<sub>4</sub>

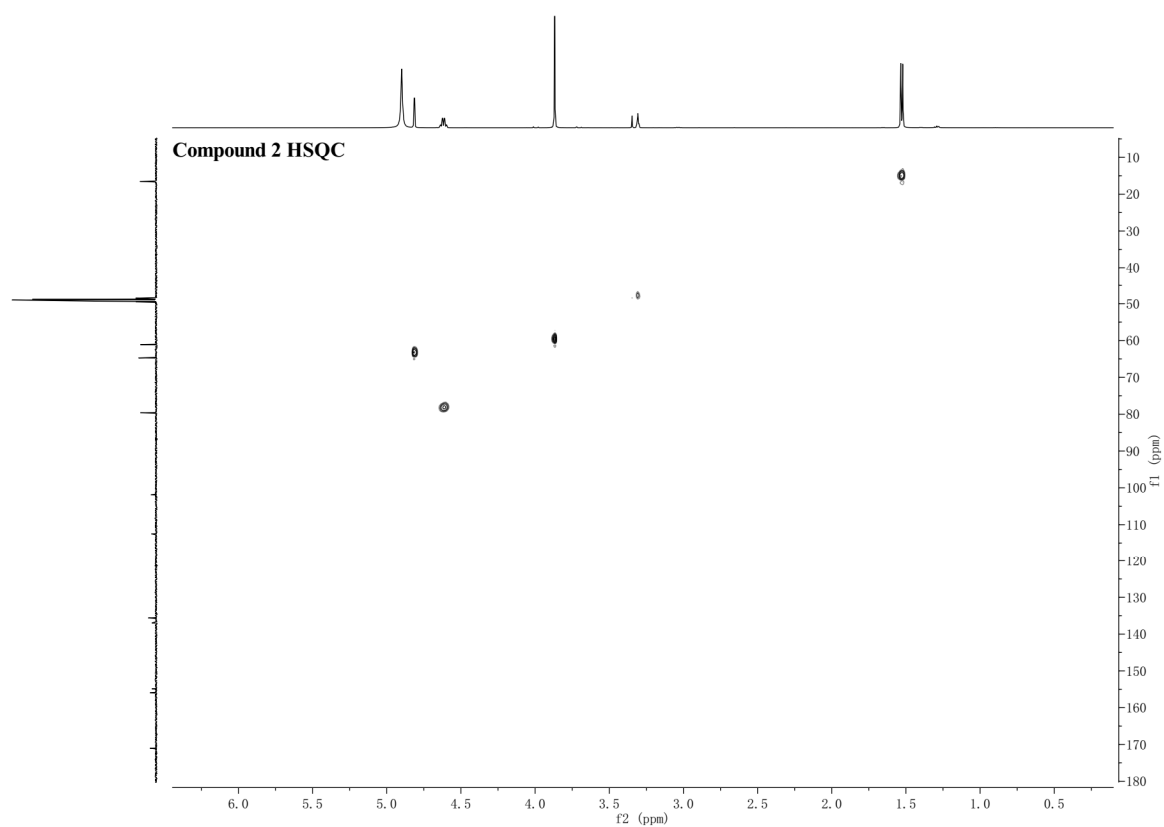

**Figure S10.** <sup>1</sup>H-<sup>1</sup>H COSY spectrum (500 MHz) of compound **2** in CH<sub>3</sub>OH-*d*<sub>4</sub>

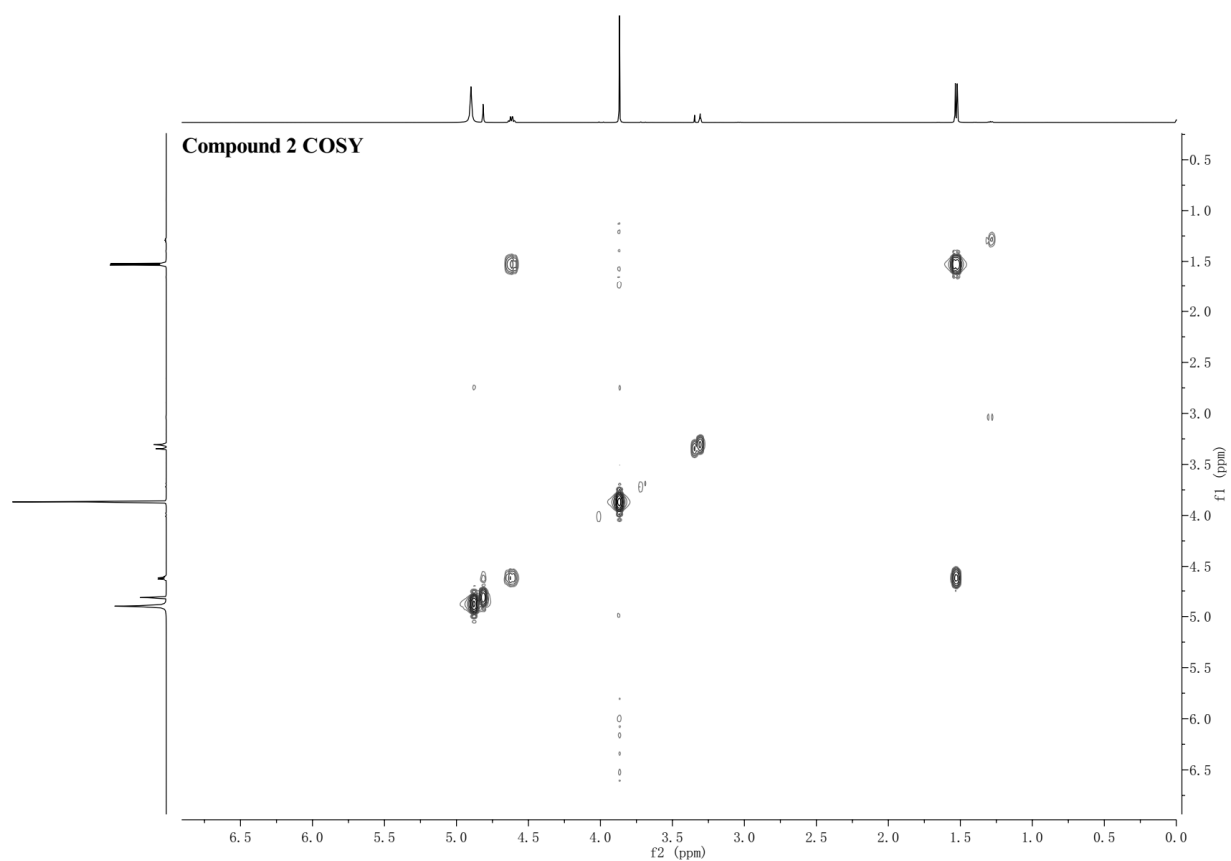

**Figure S11.** HMBC spectrum (500 MHz) of compound **2** in CH<sub>3</sub>OH-*d*<sub>4</sub>

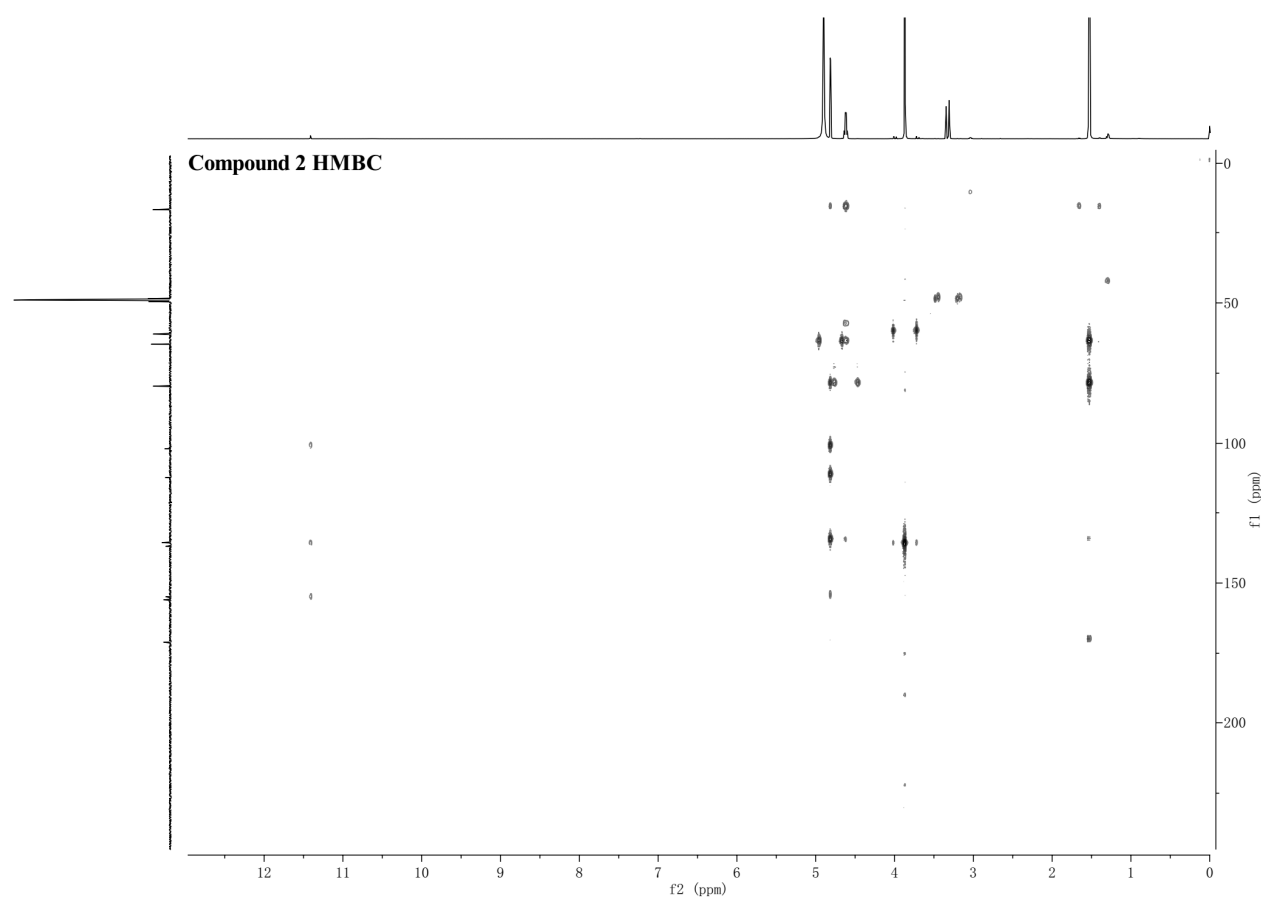

**Figure S12.** HRESIMS spectrum for compound 2

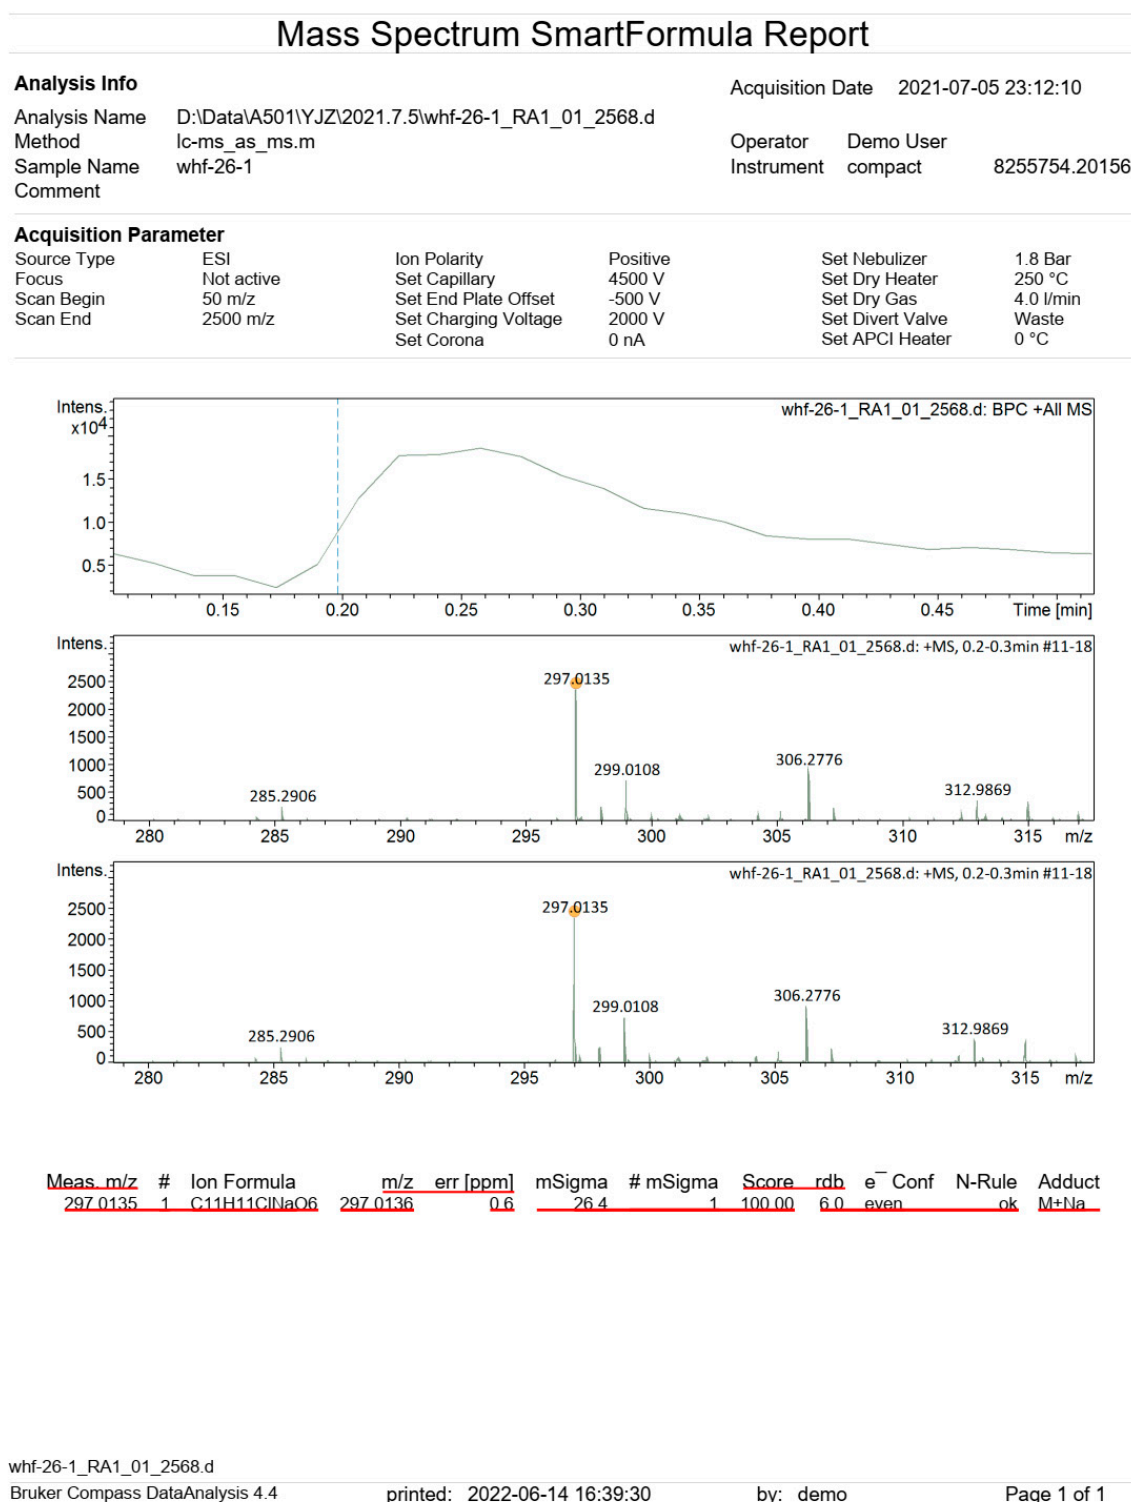

**Figure S13.**  $^1\text{H}$  NMR spectrum (500 MHz) data for compound **3** in  $\text{CH}_3\text{OH}-d_4$

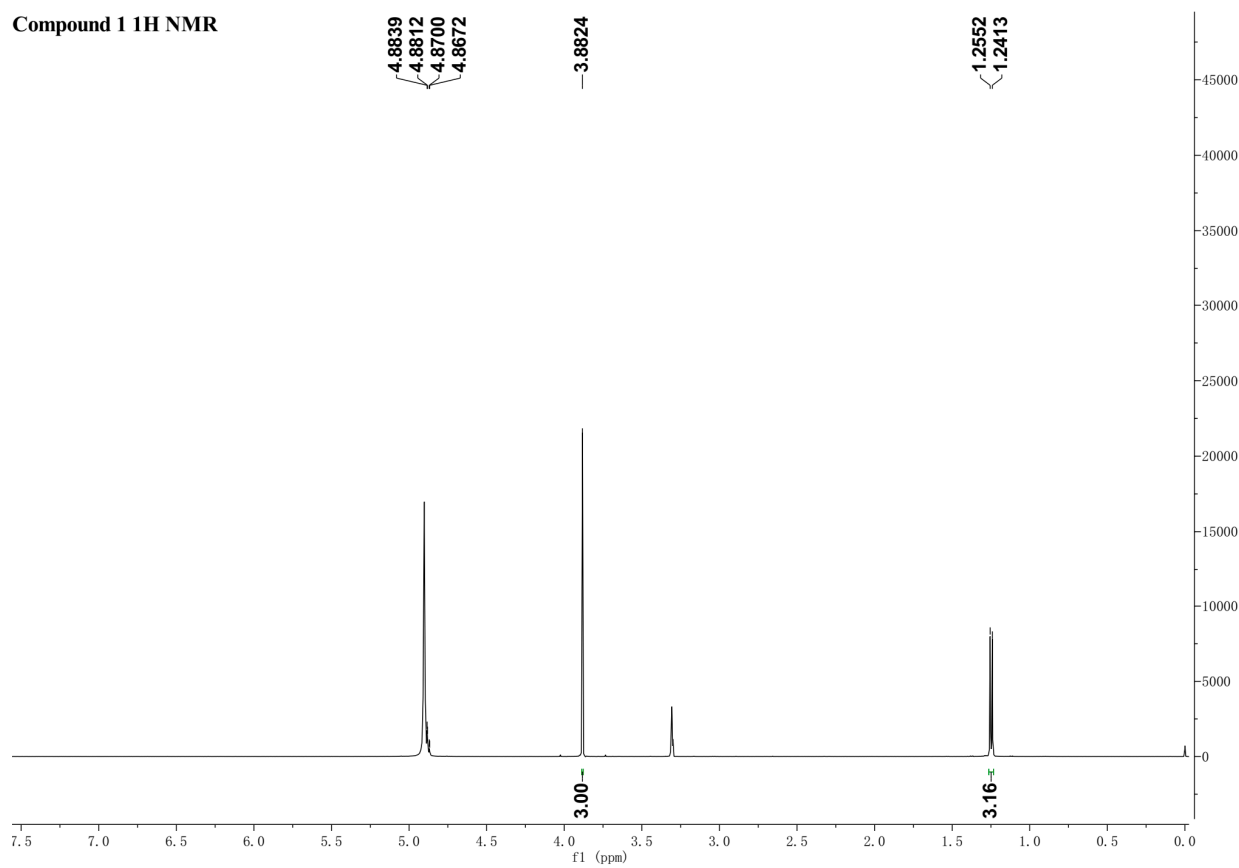

**Figure S14.**  $^{13}\text{C}$  NMR and DEPT135 spectra (125 MHz) data for compound **3** in  $\text{CH}_3\text{OH}-d_4$

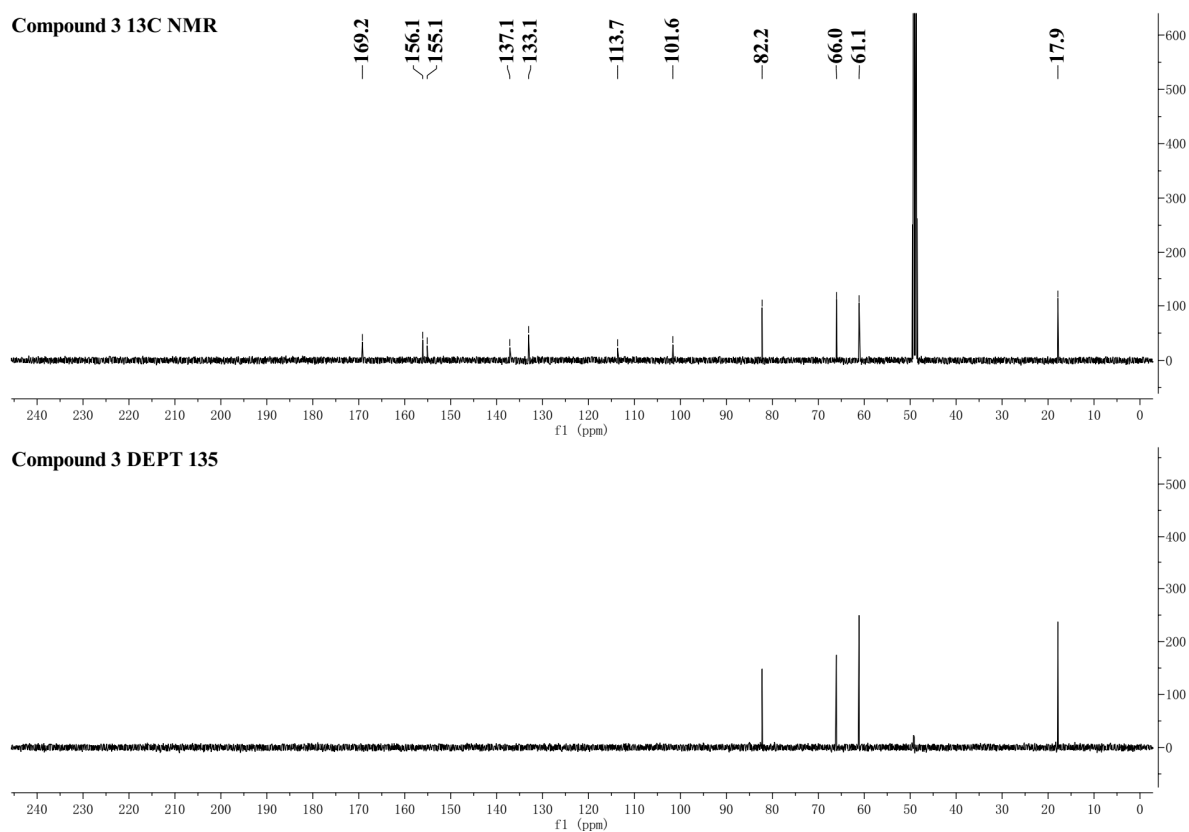

**Figure S15.** HSQC spectrum (500 MHz) of compound **3** in CH<sub>3</sub>OH-*d*<sub>4</sub>

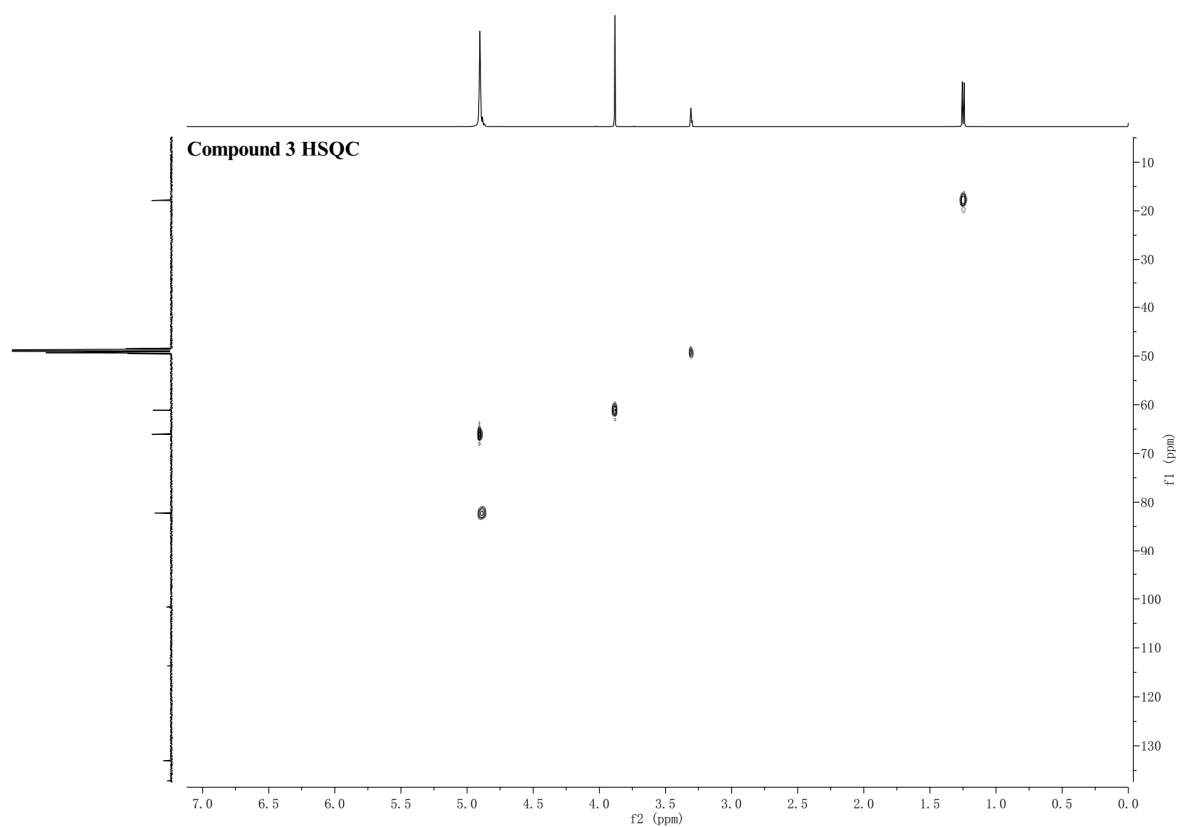

**Figure S16.** <sup>1</sup>H-<sup>1</sup>H COSY spectrum (500 MHz) of compound **3** in CH<sub>3</sub>OH-*d*<sub>4</sub>

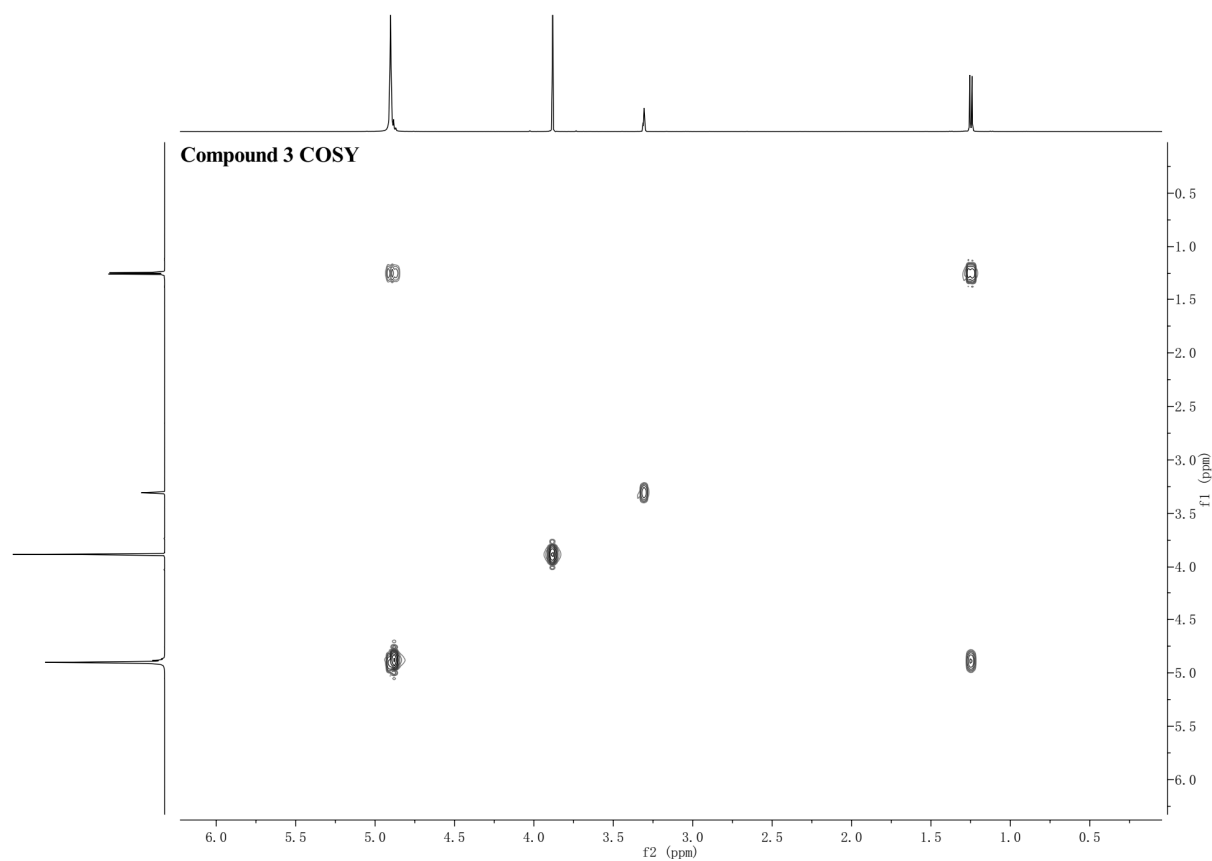

**Figure S17.** HMBC spectrum (500 MHz) of compound **3** in CH<sub>3</sub>OH-*d*<sub>4</sub>

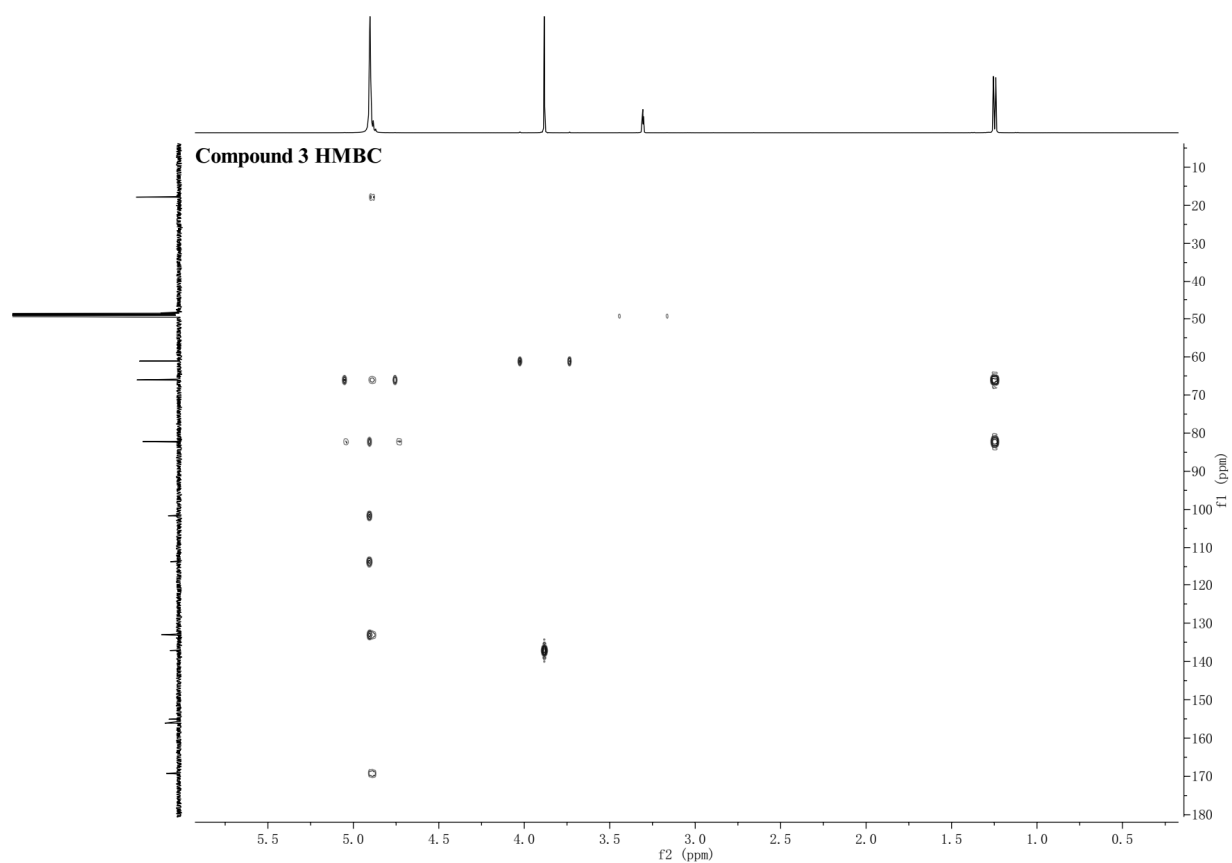

**Figure S18.** ROESY spectrum (500 MHz) of compound **3** in CH<sub>3</sub>OH-*d*<sub>4</sub>

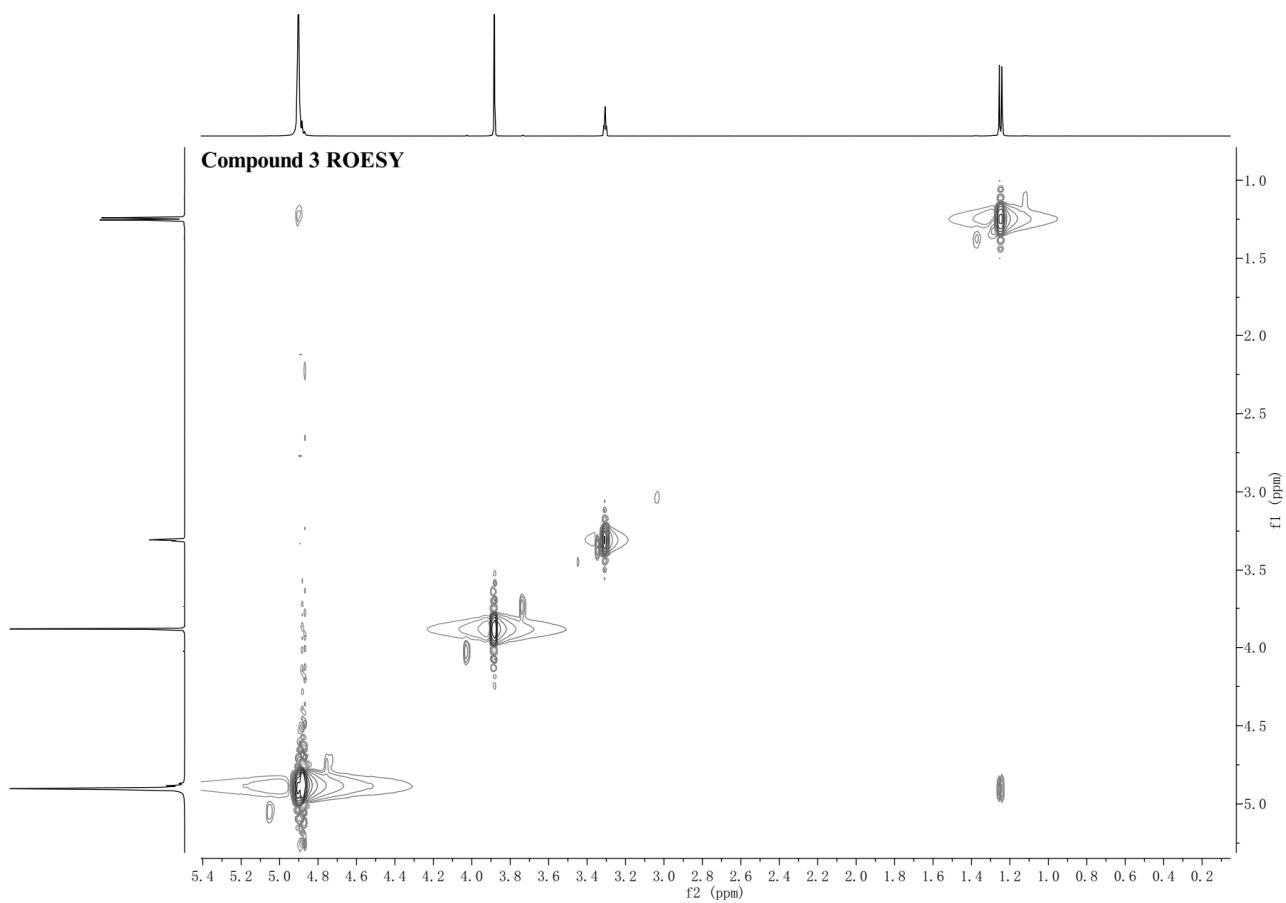

**Figure S19.** 1D NOESY spectrum (500 MHz) of compound **3** in CH<sub>3</sub>OH-*d*<sub>4</sub>

Compound **3** 1D NOESY

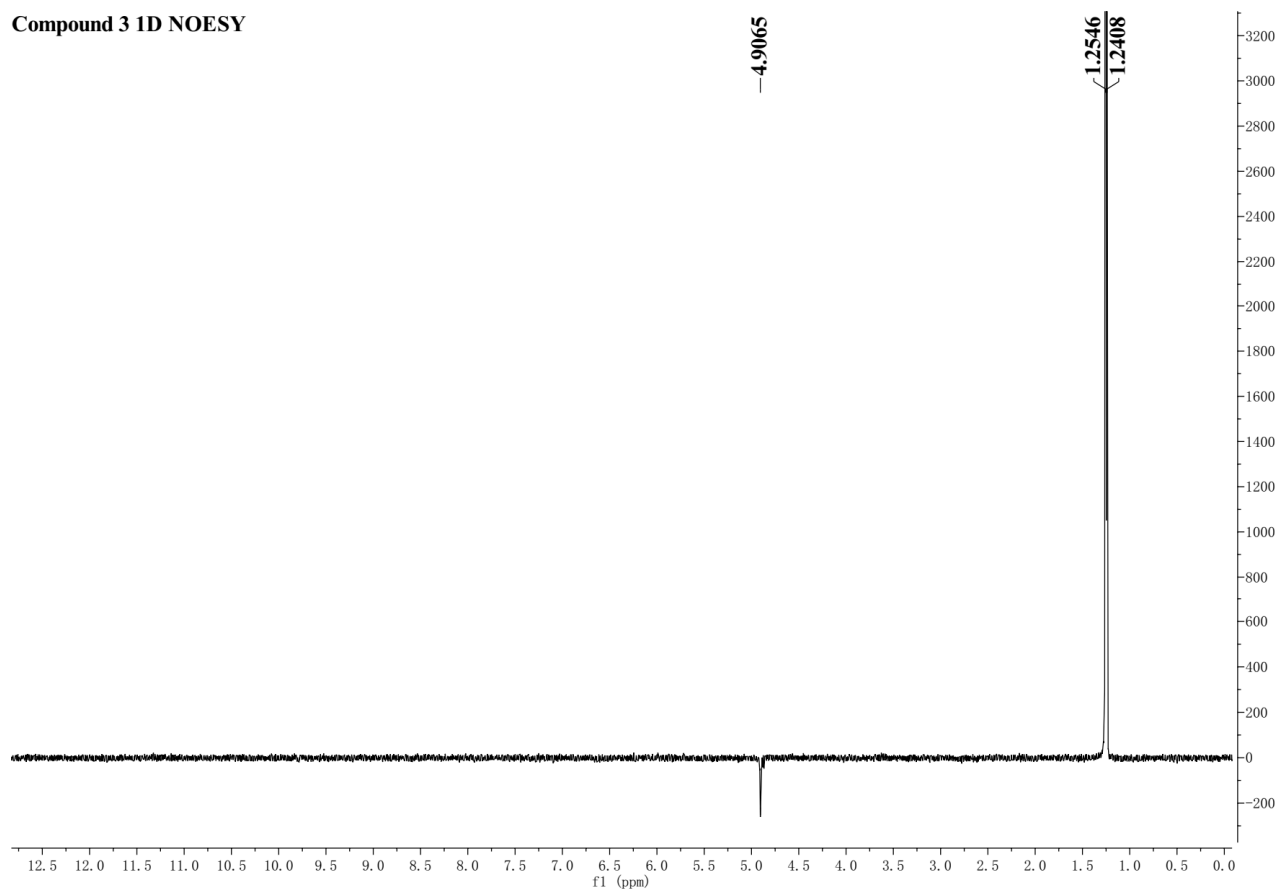



**Figure S 20.** HRESIMS spectrum for compound **3**

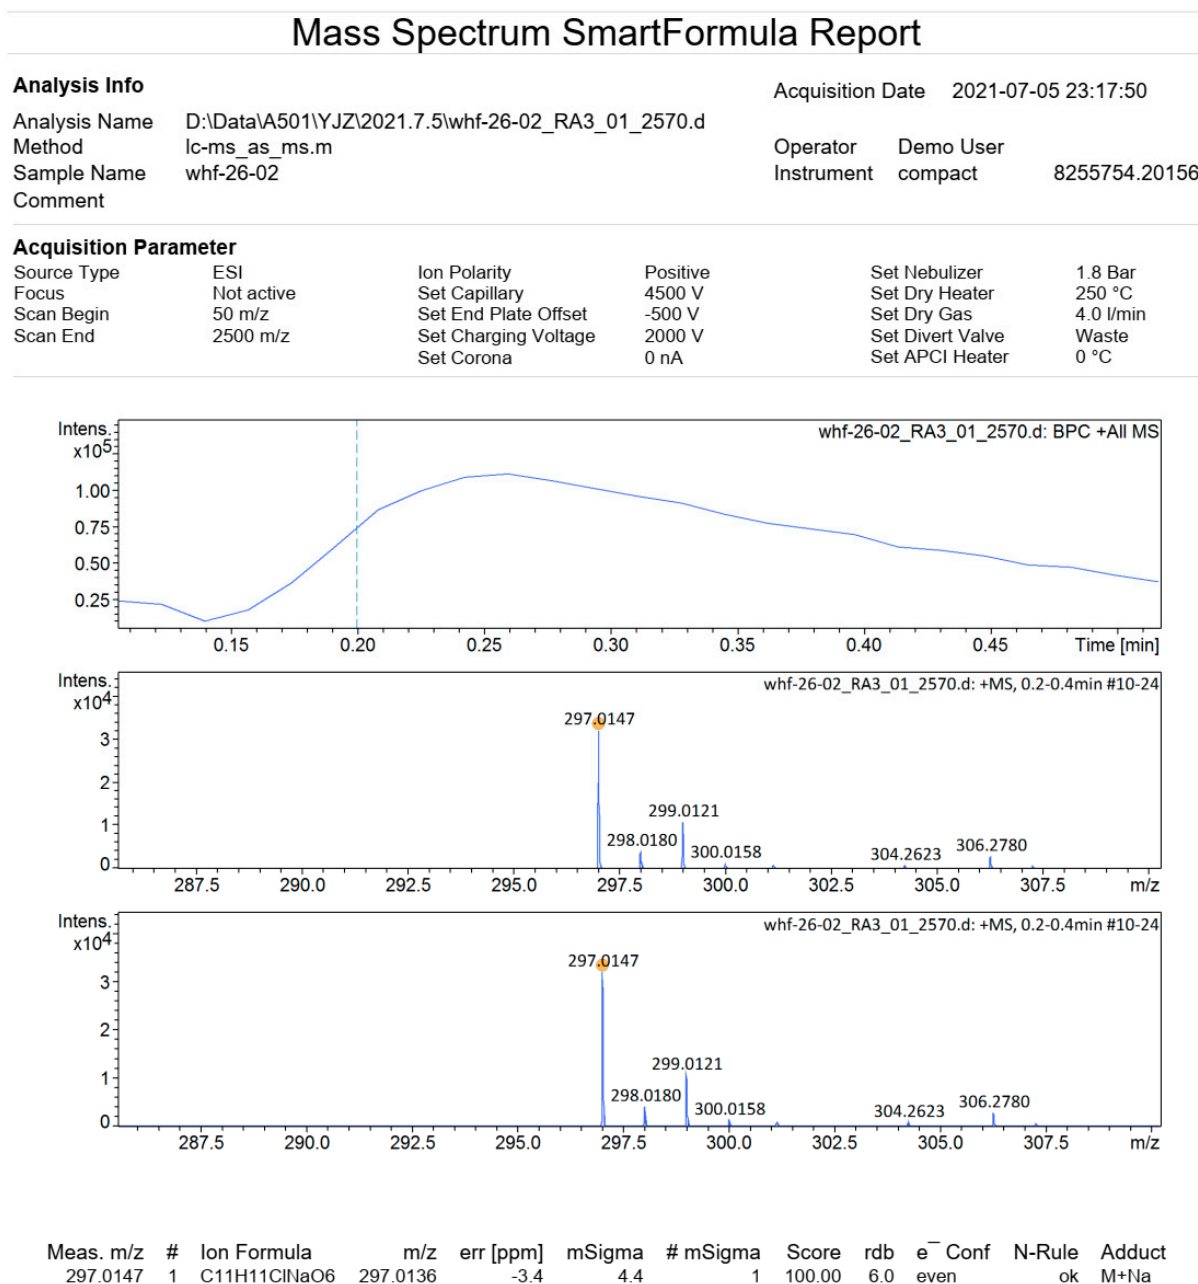

whf-26-02\_RA3\_01\_2570.d

Bruker Compass DataAnalysis 4.4

printed: 2022-06-14 16:42:33

by: demo

Page 1 of 1

**Figure S21.**  $^1\text{H}$  NMR spectrum (600 MHz) data for compound **4** in  $\text{CH}_3\text{OH}-d_4$

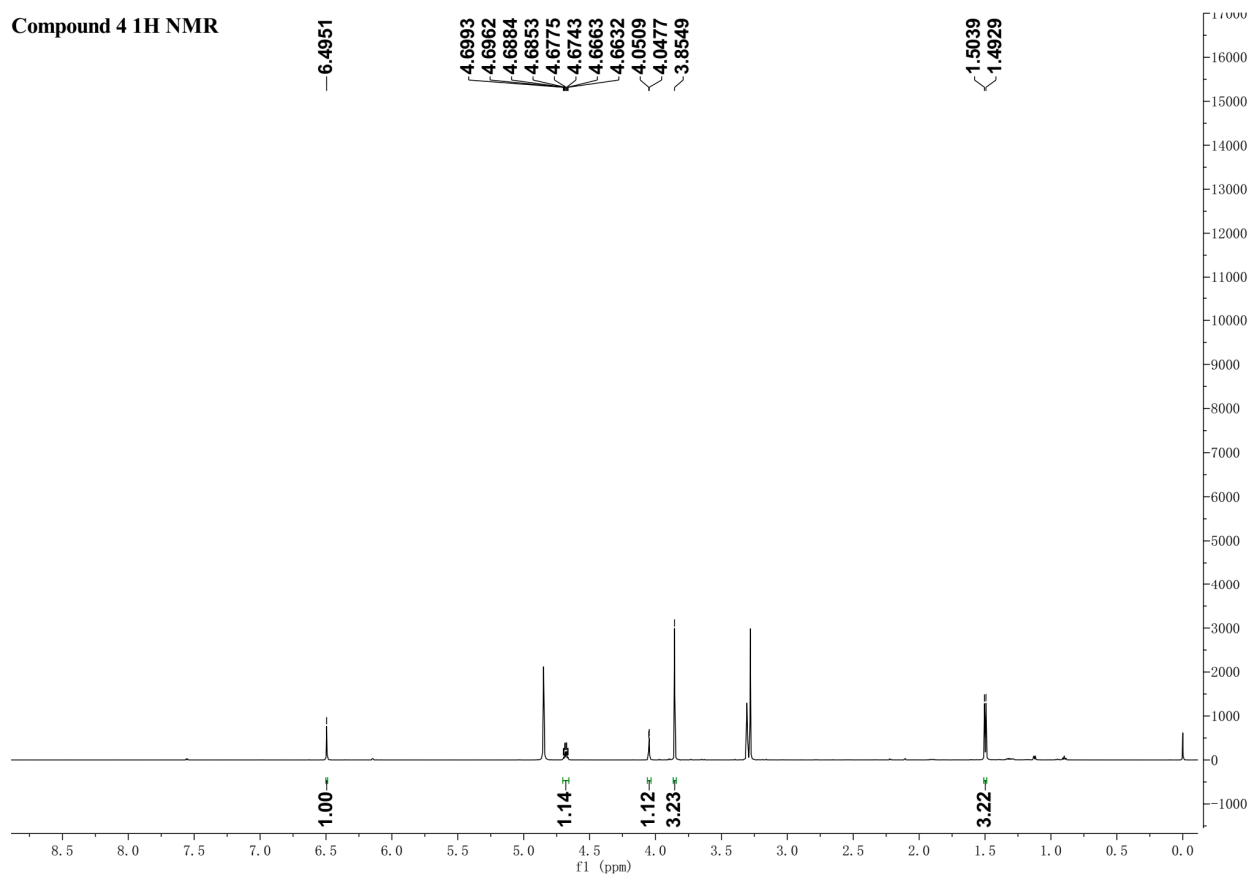

**Figure S22.**  $^{13}\text{C}$  NMR and DEPT135 spectra (150 MHz) data for compound **4** in  $\text{CH}_3\text{OH}-d_4$

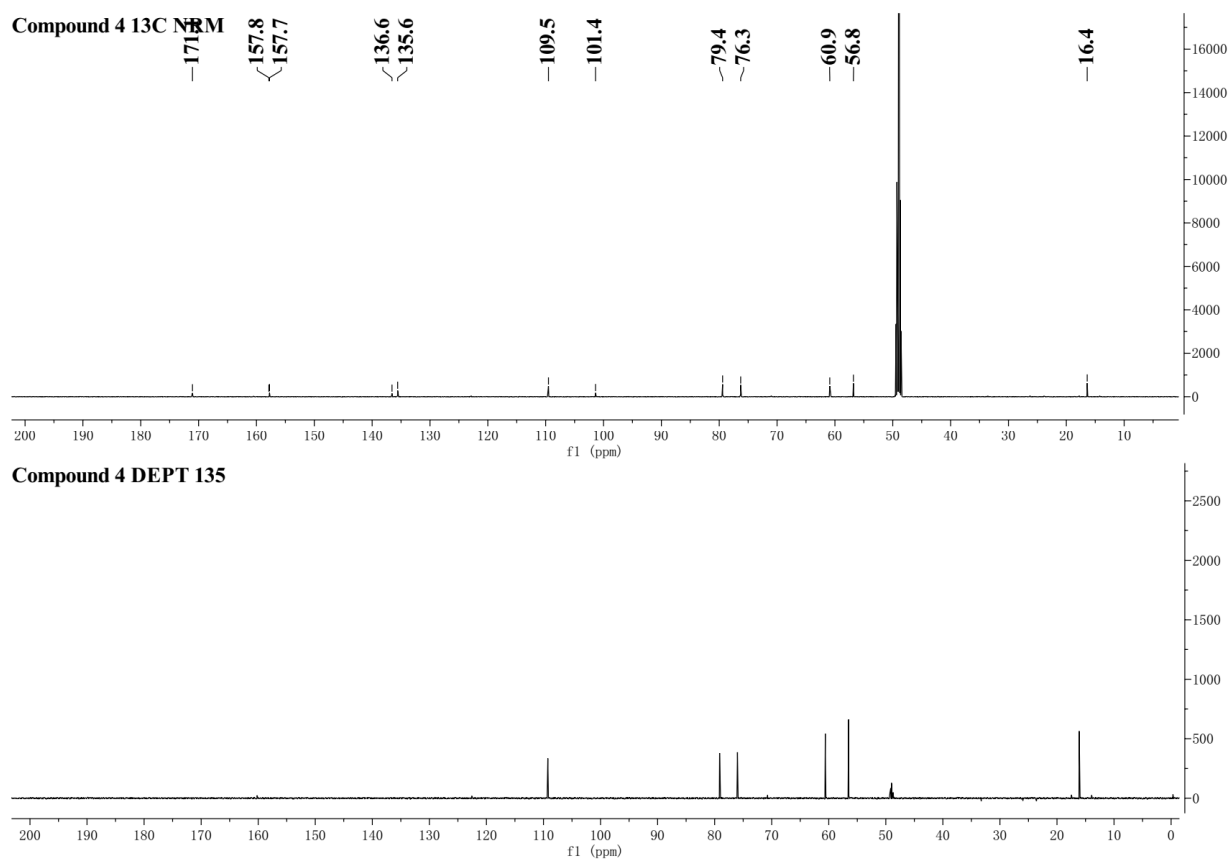

**Figure S23.** HSQC spectrum (600 MHz) of compound **4** in CH<sub>3</sub>OH-*d*<sub>4</sub>

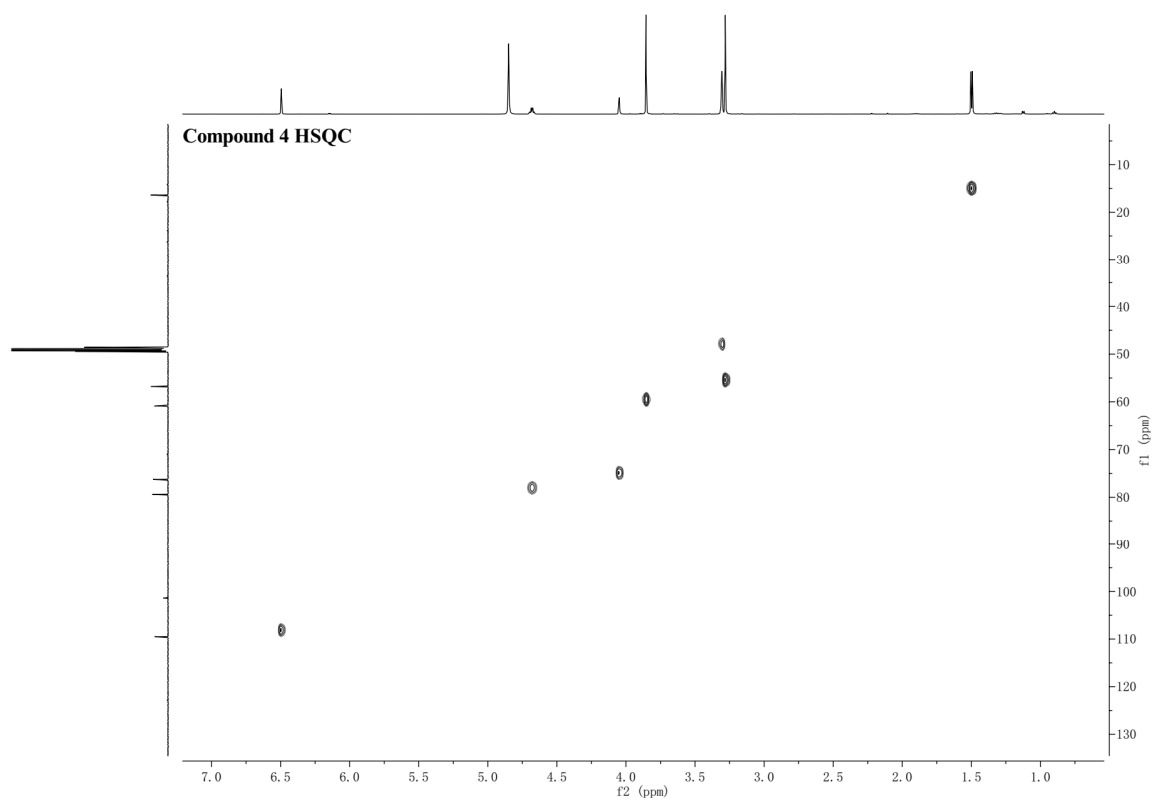

**Figure S24.** <sup>1</sup>H-<sup>1</sup>H COSY spectrum (600 MHz) of compound **4** in CH<sub>3</sub>OH-*d*<sub>4</sub>

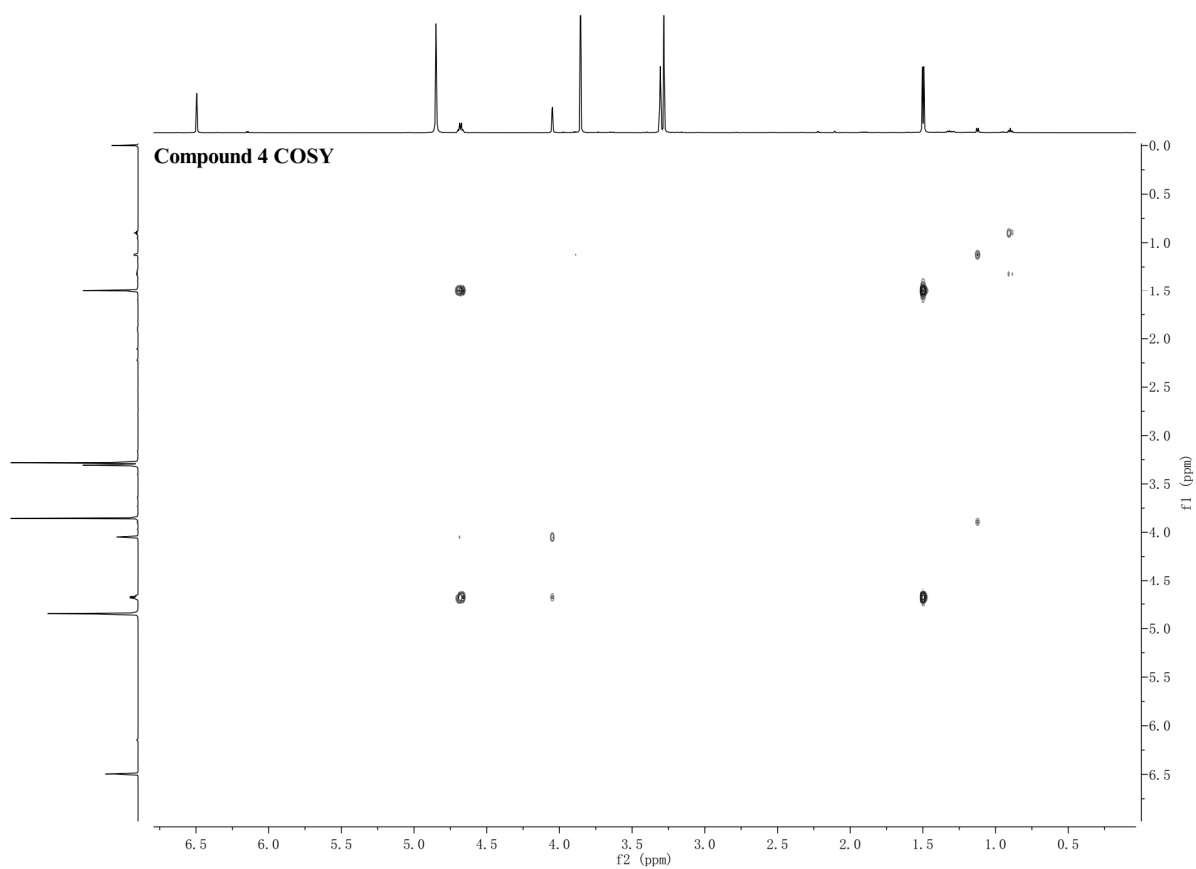

**Figure S25.** HMBC spectrum (600 MHz) of compound **4** in CH<sub>3</sub>OH-*d*<sub>4</sub>

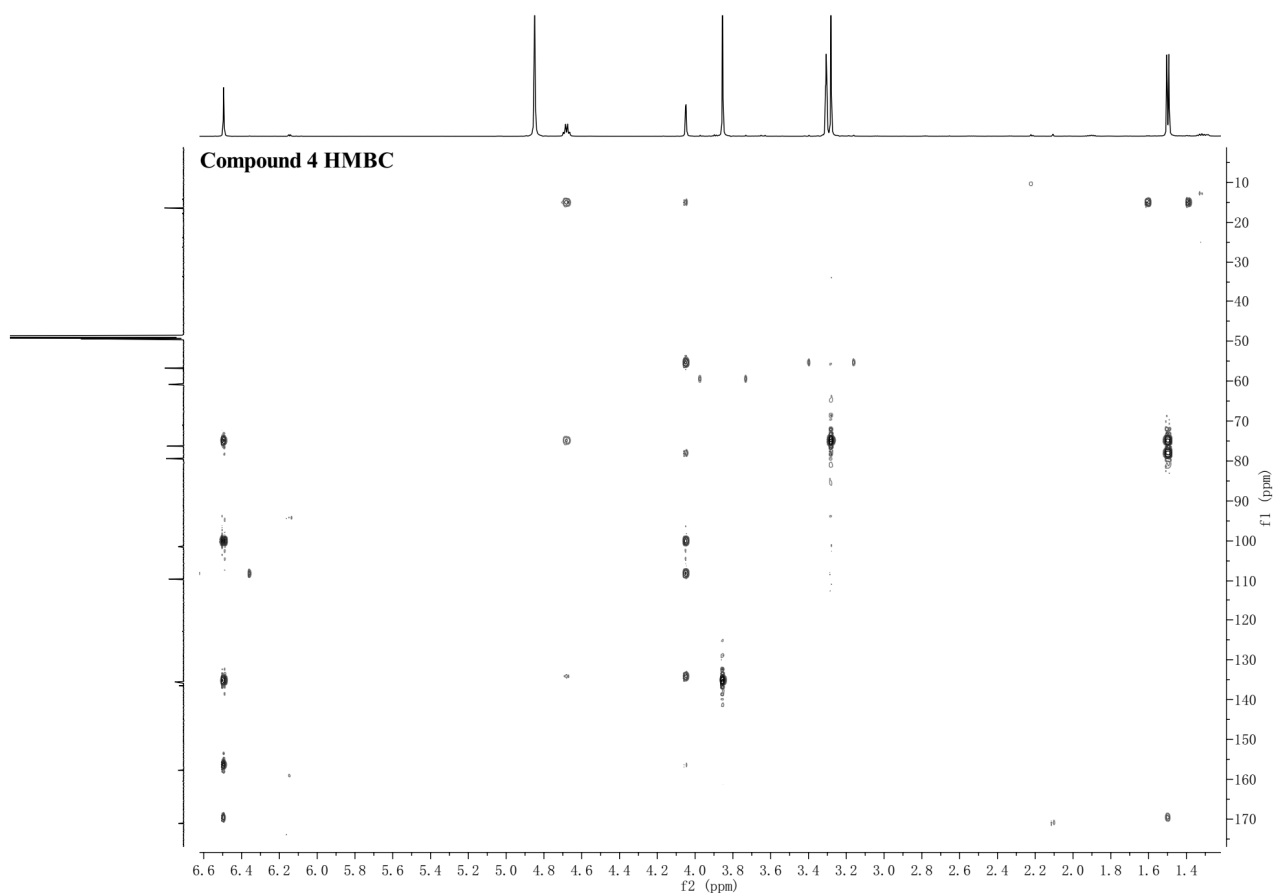

Figure S26. HRESIMS spectrum for compound 4

| Mass Spectrum SmartFormula Report |                                                 |                      |                                      |                       |           |
|-----------------------------------|-------------------------------------------------|----------------------|--------------------------------------|-----------------------|-----------|
| Analysis Info                     |                                                 |                      | Acquisition Date 2021-11-01 22:06:13 |                       |           |
| Analysis Name                     | D:\Data\A501\YJZ\2021.11.1\WHF-24_BC3_01_3186.d |                      | Operator                             | Demo User             |           |
| Method                            | lc-ms_as_ms.m                                   |                      | Instrument                           | compact 8255754.20156 |           |
| Sample Name                       | WHF-24                                          |                      |                                      |                       |           |
| Comment                           |                                                 |                      |                                      |                       |           |
| Acquisition Parameter             |                                                 |                      |                                      |                       |           |
| Source Type                       | ESI                                             | Ion Polarity         | Positive                             | Set Nebulizer         | 1.8 Bar   |
| Focus                             | Not active                                      | Set Capillary        | 4500 V                               | Set Dry Heater        | 220 °C    |
| Scan Begin                        | 50 m/z                                          | Set End Plate Offset | -500 V                               | Set Dry Gas           | 4.0 l/min |
| Scan End                          | 2500 m/z                                        | Set Charging Voltage | 2000 V                               | Set Divert Valve      | Waste     |
|                                   |                                                 | Set Corona           | 0 nA                                 | Set APCI Heater       | 0 °C      |

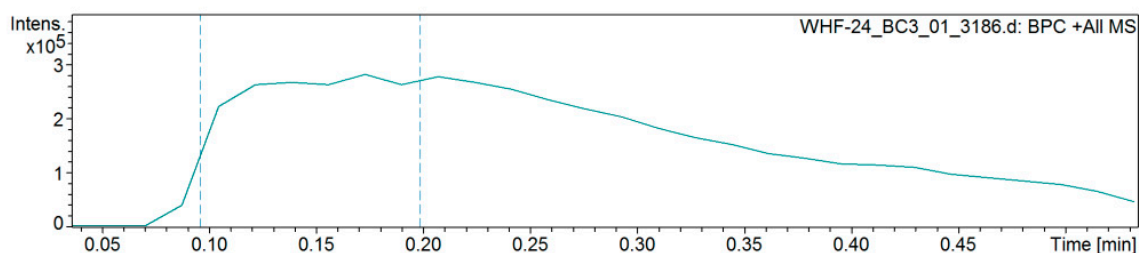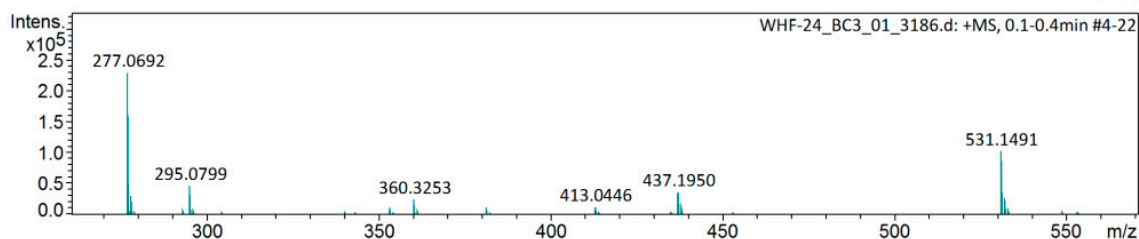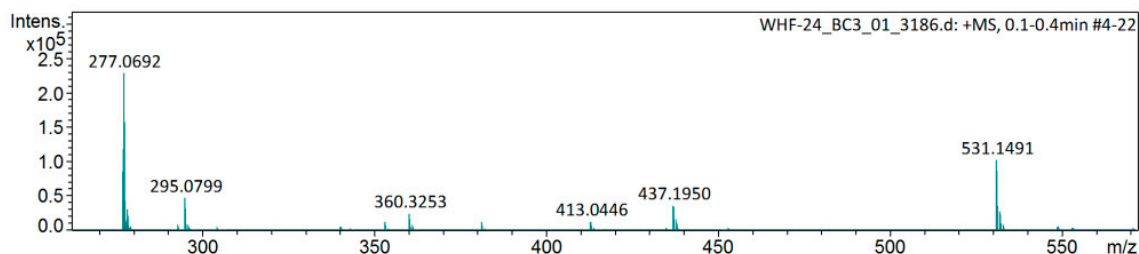

**Figure S27.**  $^1\text{H}$  NMR spectrum (600 MHz) data for compound **5** in  $\text{CH}_3\text{OH}-d_4$

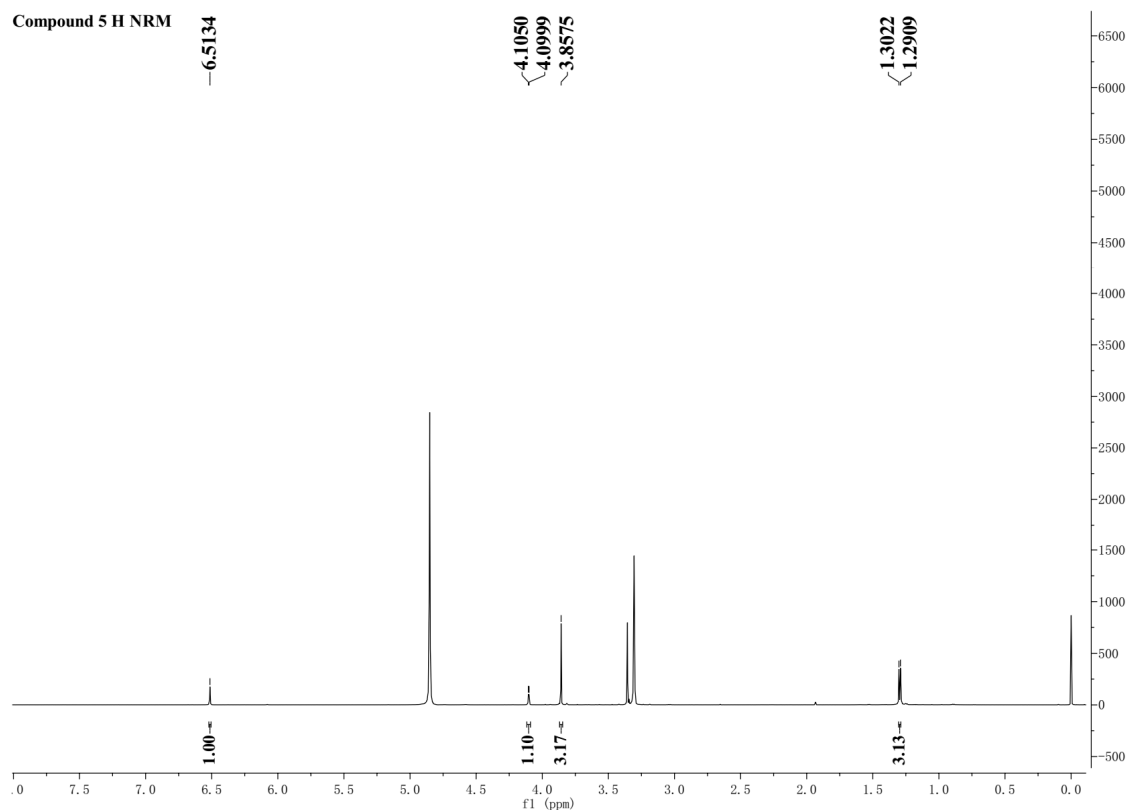

**Figure S28.**  $^{13}\text{C}$  NMR and DEPT135 spectra (150 MHz) data for compound **5** in  $\text{CH}_3\text{OH}-d_4$

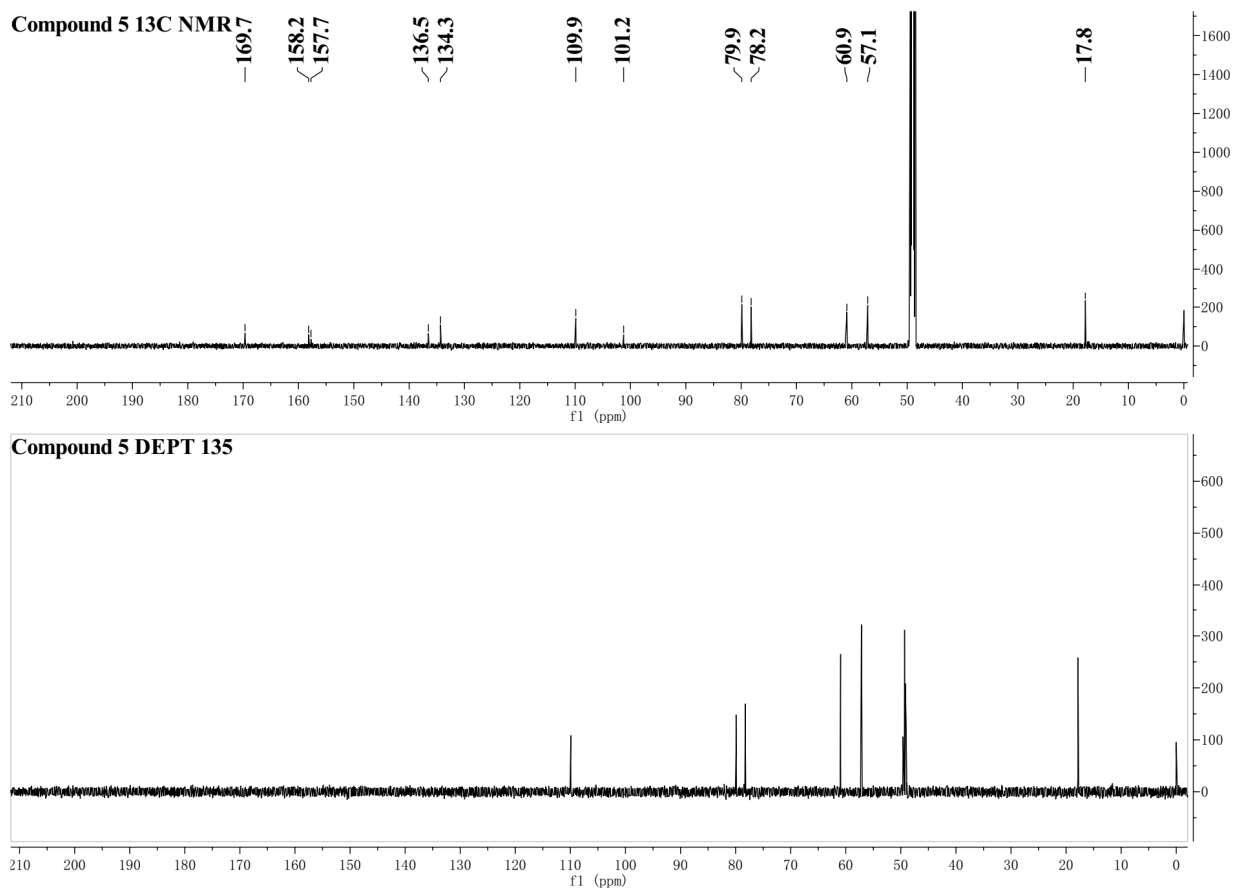

**Figure S29.** HSQC spectrum (600 MHz) of compound **5** in CH<sub>3</sub>OH-*d*<sub>4</sub>

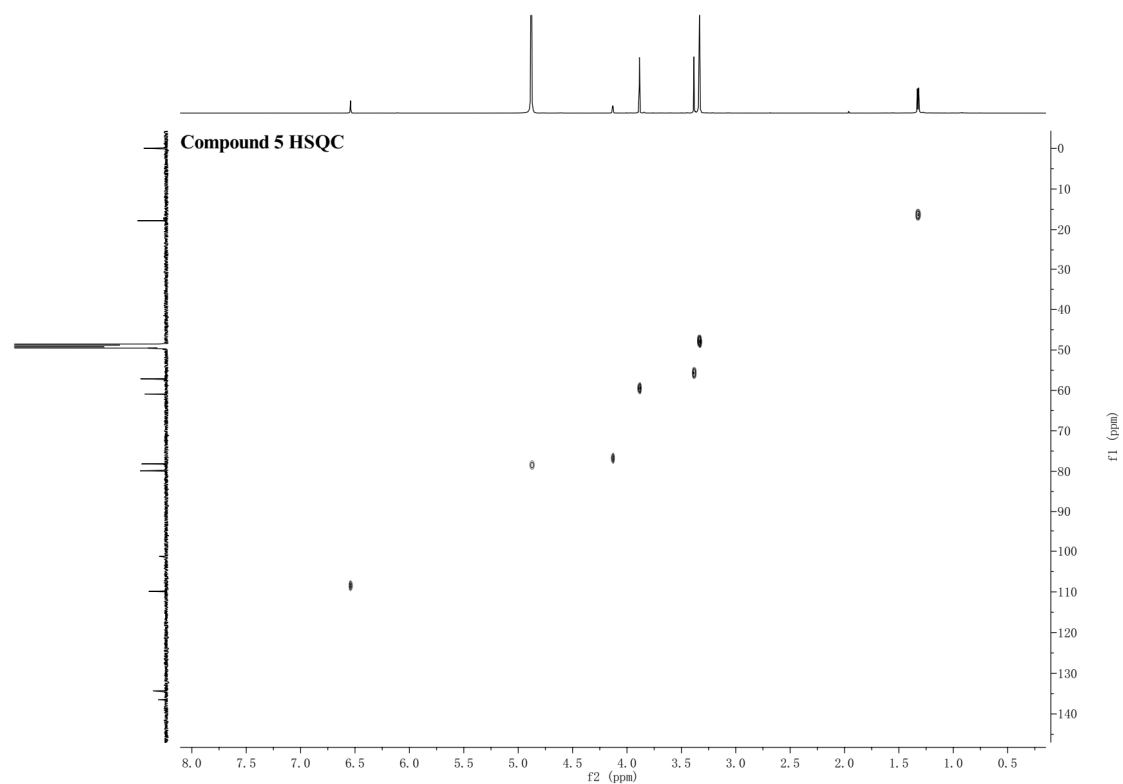

**Figure S30.** <sup>1</sup>H-<sup>1</sup>H COSY spectrum (600 MHz) of compound **5** in CH<sub>3</sub>OH-*d*<sub>4</sub>

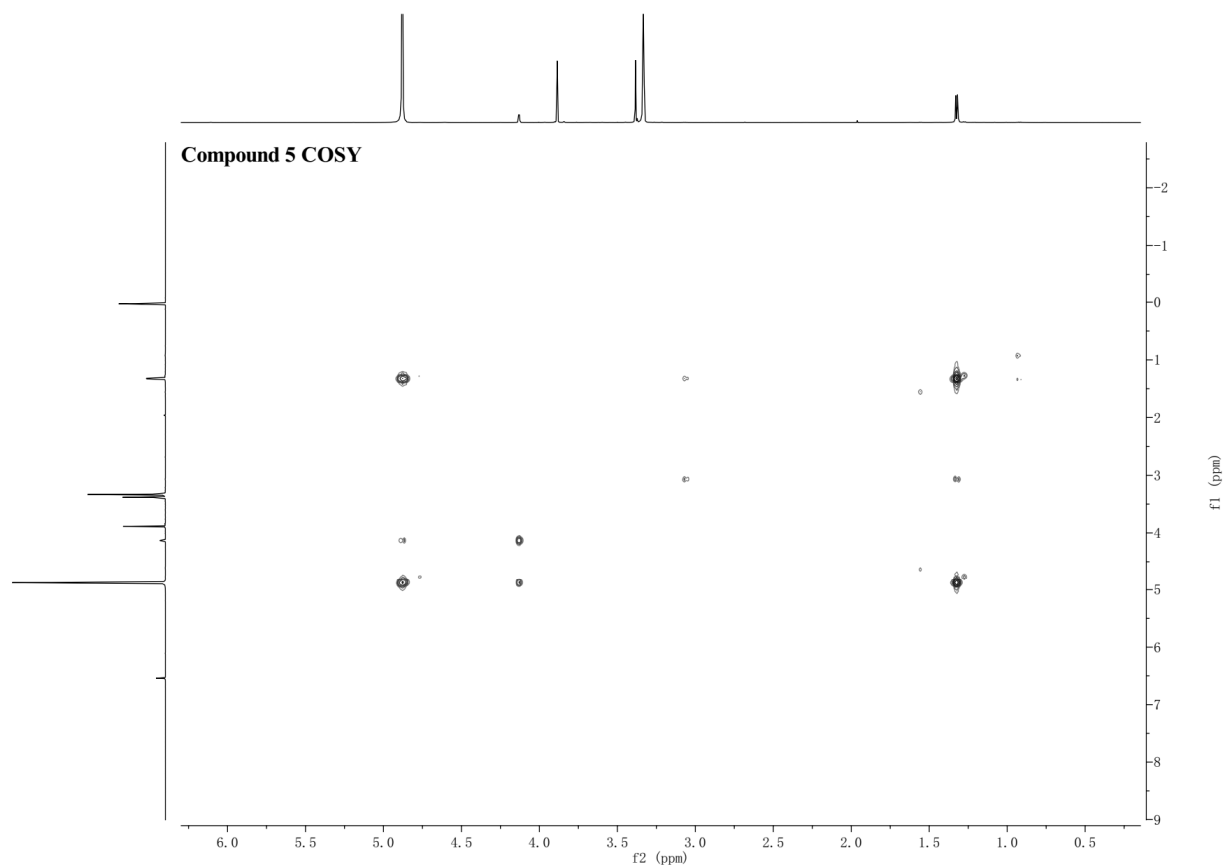

**Figure S31.** HMBC spectrum (600 MHz) of compound **5** in  $\text{CH}_3\text{OH}-d_4$

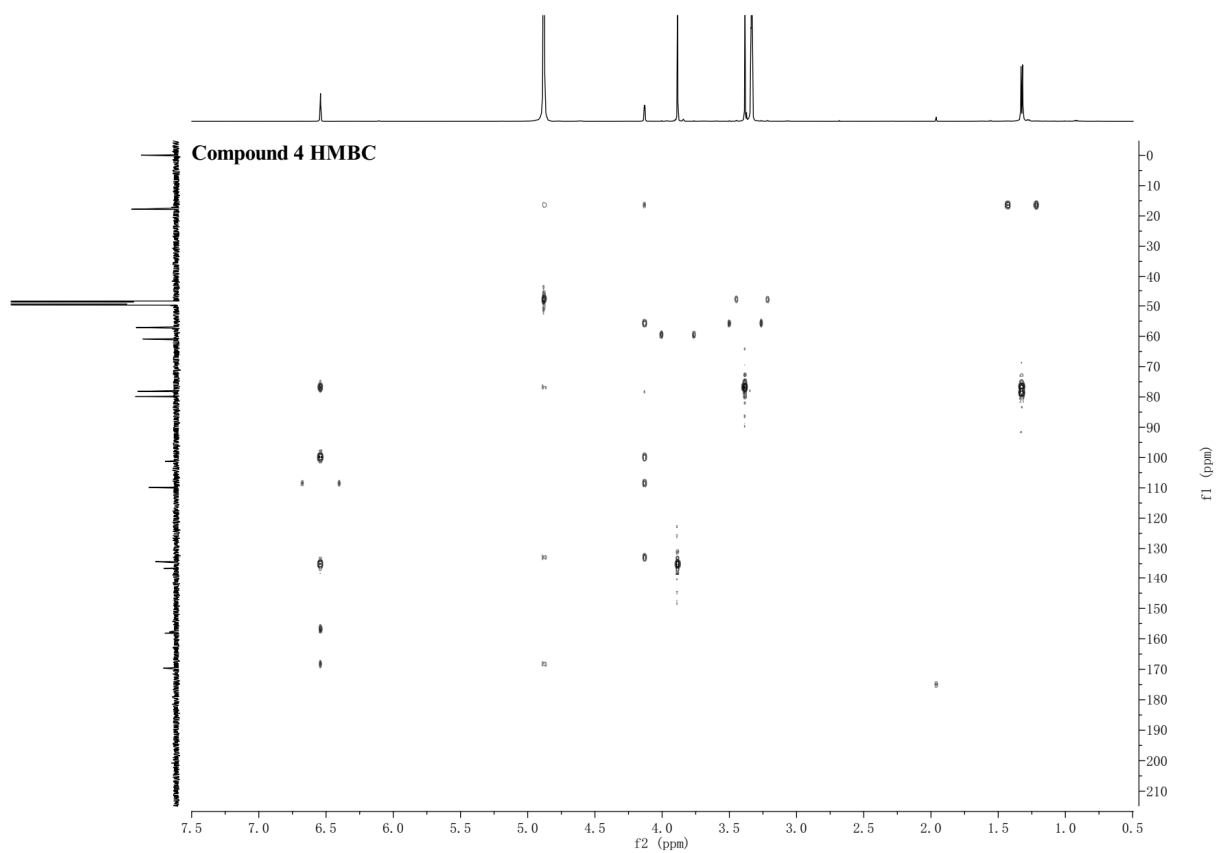

**Figure S32.** ROESY spectrum (500 MHz) of compound **5** in  $\text{CH}_3\text{OH}-d_4$

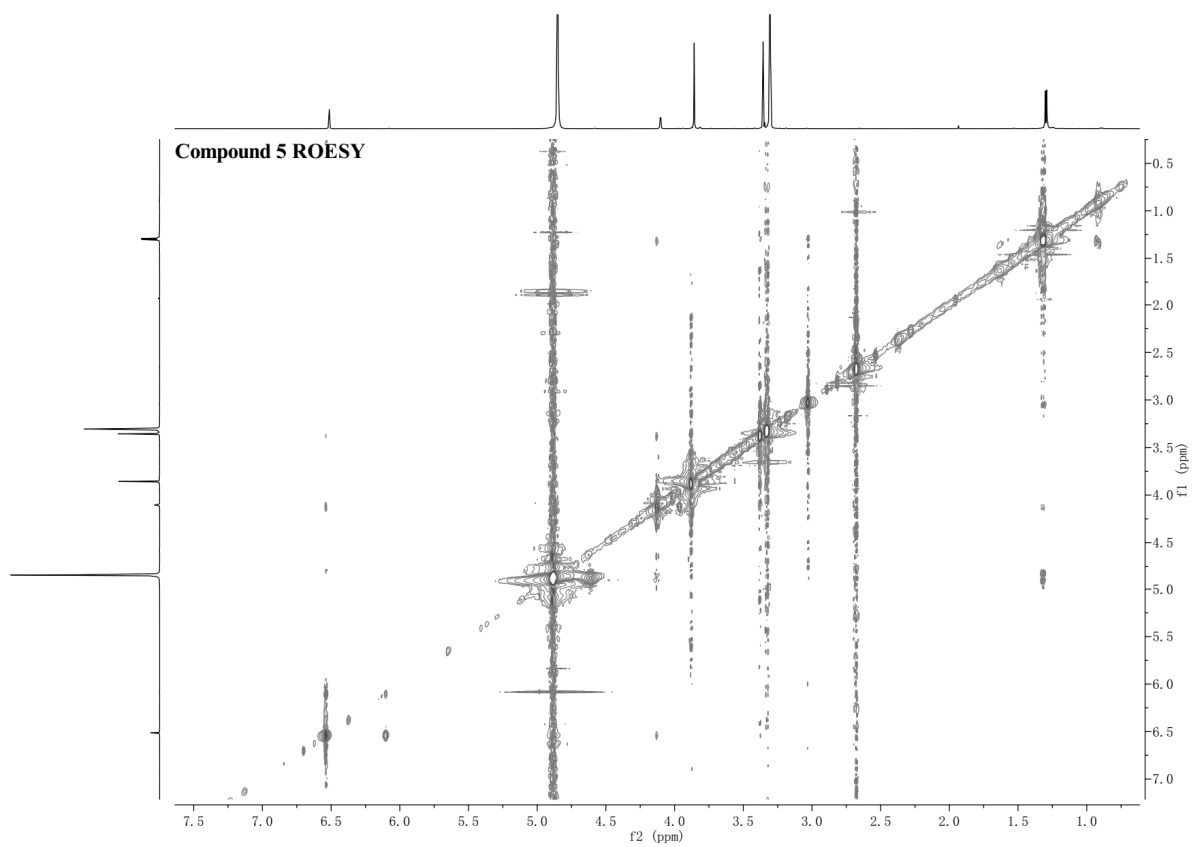



**Figure S33.** 1D NOESY spectrum (500 MHz) of compound **5** in CH<sub>3</sub>OH-*d*<sub>4</sub>

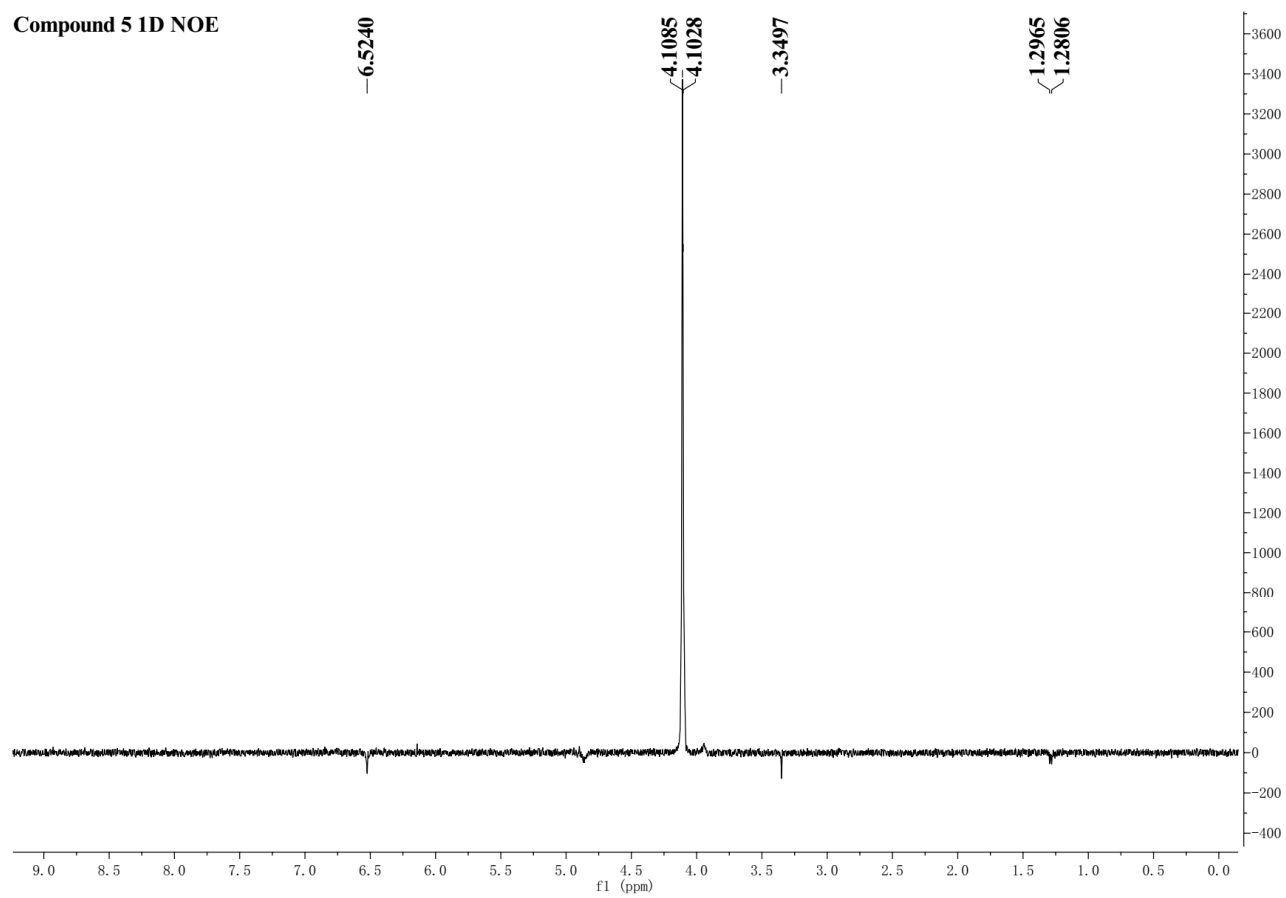

**Figure S34.** HRESIMS spectrum for compound **5**

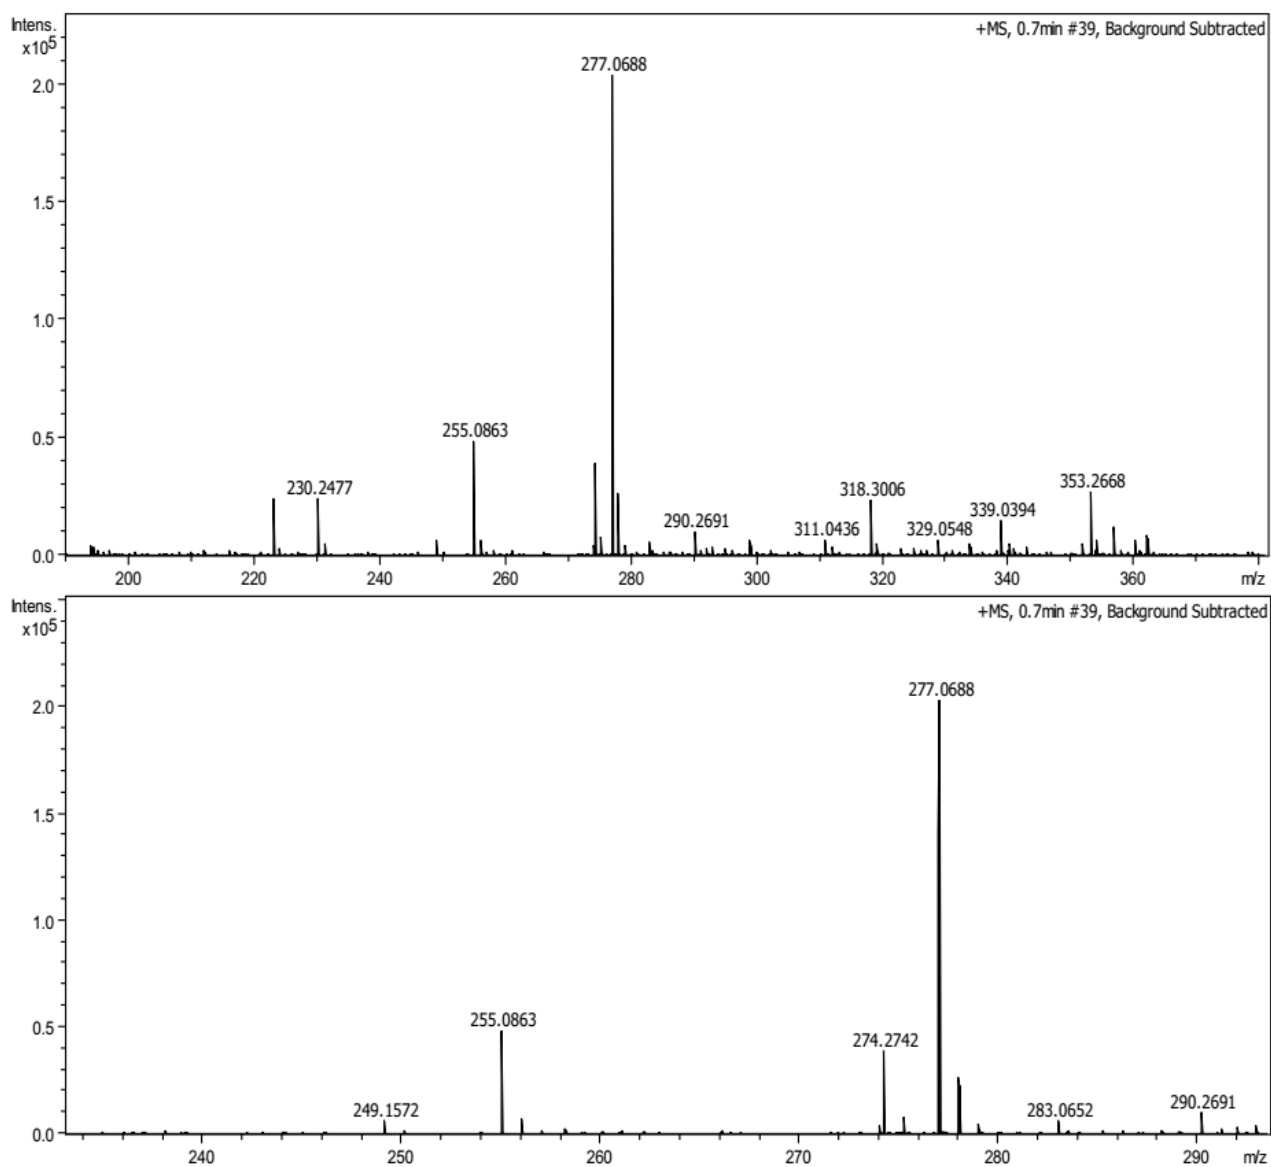

| Meas. m/z | #          | Ion Formula  | m/z | err [ppm] | mSigma | # Sigma | Score | rdb | e <sup>-</sup>       | Conf | N-Rule |
|-----------|------------|--------------|-----|-----------|--------|---------|-------|-----|----------------------|------|--------|
| 255.08631 | C12H15O6   | 255.0863-0.0 | 4.4 | 1         | 100.00 | 5.5     | even  | ok  | (M+H <sup>+</sup> )  |      |        |
| 277.06881 | C12H14NaO6 | 277.0683-1.9 | 2.0 | 1         | 100.00 | 5.5     | even  | ok  | (M+Na <sup>+</sup> ) |      |        |

**Table S1.** <sup>1</sup>H and <sup>13</sup>C NMR Data for compound **6** and 6,8-dihydroxy-7-methoxy-3-methylisocoumarin in CH<sub>3</sub>OH-*d*<sub>4</sub>

| Position | <b>6</b>              |            |                         | <b>6,8-dihydroxy-7-methoxy-3-methylisocoumarin</b> |            |                         |
|----------|-----------------------|------------|-------------------------|----------------------------------------------------|------------|-------------------------|
|          | $\delta_C$ , type     | $\delta_H$ | mult. ( <i>J</i> in Hz) | $\delta_C$ , type                                  | $\delta_H$ | mult. ( <i>J</i> in Hz) |
| 1        | 168.1, C              |            | —                       | 168.2, C                                           |            | —                       |
| 2        | —                     |            | —                       | —                                                  |            | —                       |
| 3        | 154.6, C              |            | —                       | 154.6, C                                           |            | —                       |
| 4        | 105.3, CH             |            | 6.29, s                 | 105.3, CH                                          |            | 6.30, s                 |
| 5        | 103.7, CH             |            | 6.37, s                 | 104.0, CH                                          |            | 6.38, s                 |
| 6        | 160.0, C              |            | —                       | 161.0, C                                           |            | —                       |
| 7        | 135.2, C              |            | —                       | 135.5, C                                           |            | —                       |
| 8        | 156.1, C              |            | —                       | 156.2, C                                           |            | —                       |
| 9        | 100.4, C              |            | —                       | 100.0, C                                           |            | —                       |
| 10       | 136.1, C              |            | —                       | 136.2, C                                           |            | —                       |
| 11       | 19.1, CH <sub>3</sub> |            | 2.22, s                 | 19.1, CH <sub>3</sub>                              |            | 2.19, s                 |
| 12       | 61.0, CH <sub>3</sub> |            | 3.86, s                 | 60.9, CH <sub>3</sub>                              |            | 3.84, s                 |

**Table S2.** <sup>1</sup>H and <sup>13</sup>C NMR Data for compound **7** and Diaporthein A in CHCl<sub>3</sub>-*d*

| Position | <b>7</b>               |            |                                | <b>Diaporthein A</b>   |            |                                |
|----------|------------------------|------------|--------------------------------|------------------------|------------|--------------------------------|
|          | $\delta_C$ , type      | $\delta_H$ | mult. ( <i>J</i> in Hz)        | $\delta_C$ , type      | $\delta_H$ | mult. ( <i>J</i> in Hz)        |
| 1        | 24.8, CH <sub>2</sub>  |            | 1.70, m; 1.82, m               | 24.8, CH <sub>2</sub>  |            | 1.70, m; 1.82, m               |
| 2        | 18.0, CH <sub>2</sub>  |            | 1.61, m; 1.67, m               | 18.0, CH <sub>2</sub>  |            | 1.61, m; 1.67, m               |
| 3        | 37.7, CH <sub>2</sub>  |            | 1.22, m; 1.69, m               | 37.8, CH <sub>2</sub>  |            | 1.22, m; 1.69, m               |
| 4        | 38.0, C                |            | —                              | 38.0, C                |            | —                              |
| 5        | 81.3, C                |            | —                              | 81.3, C                |            | —                              |
| 6        | 105.9, C               |            | —                              | 105.9, C               |            | —                              |
| 7        | 73.3, CH               |            | 4.63, d, (2.2)                 | 73.3, CH               |            | 4.63, d, (2.1)                 |
| 8        | 136.8, C               |            | —                              | 136.8, C               |            | —                              |
| 9        | 77.1, C                |            | —                              | 77.1, C                |            | —                              |
| 10       | 50.1, C                |            | —                              | 50.1, C                |            | —                              |
| 11       | 67.3, CH               |            | 3.86, dd, (12.1, 4.2)          | 67.3, CH               |            | 3.86, dd, (12.0, 4.2)          |
| 12       | 40.4, CH <sub>2</sub>  |            | 1.71, m; 1.89, m,              | 40.4, CH <sub>2</sub>  |            | 1.71, m; 1.89, m               |
| 13       | 38.4, C                |            | —                              | 38.3, C                |            | —                              |
| 14       | 133.3, CH              |            | 5.99, dd, (1.6, 1.6)           | 133.3, CH              |            | 5.99, dd, (1.6, 1.7)           |
| 15       | 146.4, CH              |            | 5.85, dd, (17.5, 10.6)         | 146.4, CH              |            | 5.85, dd, (17.5, 10.7)         |
| 16       | 111.5, CH <sub>2</sub> |            | 5.04, m                        | 111.5, CH <sub>2</sub> |            | 5.04, m                        |
| 17       | 25.3, CH <sub>3</sub>  |            | 1.16, s                        | 25.3, CH <sub>3</sub>  |            | 1.16, s                        |
| 18       | 29.6, CH <sub>3</sub>  |            | 1.25, s                        | 29.6, CH <sub>3</sub>  |            | 1.26, s                        |
| 19       | 24.3, CH <sub>3</sub>  |            | 1.43, s                        | 24.2, CH <sub>3</sub>  |            | 1.44, s                        |
| 20       | 68.4, CH <sub>2</sub>  |            | 3.35, d, (9.7); 3.97, d, (9.7) | 68.3, CH <sub>2</sub>  |            | 3.36, d, (9.6); 3.97, d, (9.6) |

**Table S3.**  $^1\text{H}$  and  $^{13}\text{C}$  NMR Data for compound **8** and Diaporthein B in  $\text{CHCl}_3-d$ 

| Position | 8                          |                                        | Diaporthein B              |                                        |
|----------|----------------------------|----------------------------------------|----------------------------|----------------------------------------|
|          | $\delta_{\text{C}}$ , type | $\delta_{\text{H}}$ mult. ( $J$ in Hz) | $\delta_{\text{C}}$ , type | $\delta_{\text{H}}$ mult. ( $J$ in Hz) |
| 1        | 25.2, $\text{CH}_2$        | 1.96, m; 2.03, m                       | 25.2, $\text{CH}_2$        | 1.96, m; 2.03, m                       |
| 2        | 17.7, $\text{CH}_2$        | 1.62, m; 1.68, m                       | 17.6, $\text{CH}_2$        | 1.62, m; 1.68, m                       |
| 3        | 37.5, $\text{CH}_2$        | 1.24, m; 1.56, m                       | 37.5, $\text{CH}_2$        | 1.23, m; 1.55, m                       |
| 4        | 37.3, C                    | —                                      | 37.3, C                    | —                                      |
| 5        | 81.9, C                    | —                                      | 81.9, C                    | —                                      |
| 6        | 104.1, C                   | —                                      | 104.1, C                   | —                                      |
| 7        | 196.3, C                   | —                                      | 196.2, C                   | —                                      |
| 8        | 134.6, C                   | —                                      | 134.7, C                   | —                                      |
| 9        | 76.2, C                    | —                                      | 76.2, C                    | —                                      |
| 10       | 51.1, C                    | —                                      | 51.1, C                    | —                                      |
| 11       | 67.7, CH                   | 4.04, dd, (11.7, 4.1)                  | 67.7, CH                   | 4.03, dd, (11.7, 4.1)                  |
| 12       | 39.9, $\text{CH}_2$        | 1.73, m; 2.07, m,                      | 39.9, $\text{CH}_2$        | 1.73, m; 2.07, m                       |
| 13       | 40.0, C                    | —                                      | 40.1, C                    | —                                      |
| 14       | 150.5, CH                  | 6.82, d, (1.9)                         | 150.4, CH                  | 6.81, d, (1.8)                         |
| 15       | 144.0, CH                  | 5.83, dd, (17.5, 10.5)                 | 144.1, CH                  | 5.82, dd, (17.5, 10.7)                 |
| 16       | 113.1, $\text{CH}_2$       | 5.09, d, m                             | 113.1, $\text{CH}_2$       | 5.09, m                                |
| 17       | 25.9, $\text{CH}_3$        | 1.22, s                                | 25.9, $\text{CH}_3$        | 1.22, s                                |
| 18       | 27.0, $\text{CH}_3$        | 1.20, s                                | 26.9, $\text{CH}_3$        | 1.19, s                                |
| 19       | 23.6, $\text{CH}_3$        | 1.44, s                                | 23.7, $\text{CH}_3$        | 1.45, s                                |
| 20       | 68.6, $\text{CH}_2$        | 3.72, d, (10.2); 4.14, d, (10.1)       | 68.6, $\text{CH}_2$        | 3.71, d, (10.2); 4.14, d, (10.2)       |
